# **DNA from dust: the first field-isolated genomes of MDV-1, from virions in poultry dust and chicken feather follicles**

Utsav Pandey<sup>1</sup>, Andrew S. Bell<sup>2</sup>, Daniel Renner<sup>1</sup>, David Kennedy<sup>2</sup>, Jacob Shreve<sup>1</sup>, Chris Cairns<sup>2</sup>,  
Matthew Jones<sup>2</sup>, Patricia Dunn<sup>3</sup>, Andrew Read<sup>2</sup>, Moriah L. Szpara<sup>1\*</sup>

<sup>1</sup>Department of Biochemistry and Molecular Biology, and the Huck Institutes of the Life Sciences, Pennsylvania State University, University Park, Pennsylvania, 16802, USA

<sup>2</sup>Center for Infectious Disease Dynamics, Department of Biology and Entomology, Pennsylvania State University, University Park, Pennsylvania 16802, USA

<sup>3</sup> Department of Veterinary and Biomedical Sciences, Pennsylvania State University, University Park, Pennsylvania, 16802, USA

## **\*Corresponding Author**

Moriah L. Szpara  
Dept. of Biochemistry & Molecular Biology  
The Huck Institutes of the Life Sciences  
W-208 Millennium Science Complex (MSC)  
Pennsylvania State University  
University Park, PA 16802 USA  
Phone: 814-867-0008  
Email: [moriah@psu.edu](mailto:moriah@psu.edu)

## **Author emails:**

Utsav Pandey: [uup104@psu.edu](mailto:uup104@psu.edu)  
Andrew S. Bell: [asb15@psu.edu](mailto:asb15@psu.edu)  
Daniel W. Renner: [dwr19@psu.edu](mailto:dwr19@psu.edu)  
David Kennedy: [dak30@psu.edu](mailto:dak30@psu.edu)  
Jacob T. Shreve: [jtshreve@iu.edu](mailto:jtshreve@iu.edu)  
Chris Cairns: [clc5303@psu.edu](mailto:clc5303@psu.edu)  
Matthew Jones: [mjj16@psu.edu](mailto:mjj16@psu.edu)  
Patricia Dunn: [pad7@psu.edu](mailto:pad7@psu.edu)  
Andrew Read: [a.read@psu.edu](mailto:a.read@psu.edu)  
Moriah L. Szpara: [moriah@psu.edu](mailto:moriah@psu.edu)

## Abstract (382 words at present)

Marek's disease (MD) is a lymphoproliferative disease of chickens caused by airborne gallid herpesvirus type 2 (GaHV-2, aka MDV-1). Mature virions are formed in the feather follicle epithelium cells of infected chickens from which the virus is shed as fine particles of skin and feather debris, or poultry dust. Poultry dust is the major source of virus transmission between birds in agricultural settings. Despite both clinical and laboratory data that show increased virulence in field isolates of MDV-1 over the last 40 years, we do not yet understand the genetic basis of MDV-1 pathogenicity. Our present knowledge on genome-wide variation in the MDV-1 genome comes exclusively from laboratory-grown isolates. MDV-1 isolates tend to lose virulence with increasing passage number *in vitro*, raising concerns about their ability to accurately reflect virus in the field. The ability to rapidly and directly sequence field isolates of MDV-1 is critical to understanding the genetic basis of rising virulence in circulating wild strains. Here we present the first complete genomes of uncultured, field-isolated MDV-1. These five consensus genomes were derived directly from poultry dust or single chicken feather follicles without passage in cell culture. These sources represent the shed material that is transmitted to new hosts, vs. the virus produced by a point source in one animal. We developed a new procedure to extract and enrich viral DNA, while reducing host and environmental contamination. DNA was sequenced using Illumina MiSeq high-throughput approaches and processed through a recently described bioinformatics workflow for *de novo* assembly and curation of herpesvirus genomes. We comprehensively compared these genomes to one another and also to previously described MDV-1 genomes. The field-isolated genomes had remarkably high DNA identity when compared to one another, with few variant proteins between them. In an analysis of genetic distance, the five new field genomes grouped separately from all previously

described genomes. Each consensus genome was also assessed to determine the level of polymorphisms within each sample, which revealed that MDV-1 exists in the wild as a polymorphic population. By tracking a new polymorphic locus in ICP4 over time, we found that MDV-1 genomes can evolve in short period of time. Together these approaches advance our ability to assess MDV-1 variation within and between hosts, over time, and during adaptation to changing conditions.

## Introduction

Marek's disease (MD) is a lymphoproliferative disease of chickens caused by airborne gallid herpesvirus type 2 (GaHV-2), also known as Marek's disease virus 1 (MDV-1). MDV-1 is an alphaherpesvirus, in the family *Herpesviridae*, genus *Mardivirus*. In addition to MDV-1, the genus *Mardivirus* also contains the non-oncogenic MDV 2 (MDV-2, or gallid herpesvirus 3), infectious laryngotracheitis virus (ILTV, or gallid herpesvirus 1) and turkey herpesvirus 1 (HVT-1, or meleagrid herpesvirus type 1) (1–4). These Mardivirus family members belong to distinct phylogenetic sub-groups of the Mardivirus family tree with low DNA sequence identity (e.g. only 61% DNA identity between MDV-1 and MDV-2) (4).

Since the late 1960s, MD infections have been controlled via mass agricultural vaccinations of poultry. All three serotypes, MDV-1, MDV-2 and HVT-1, have been used to make modified live vaccines, which are employed either singly or in combination (3, 5). The vaccines currently being used to control Marek's disease are live-attenuated vaccines that are administered either to 18-day old embryos or immediately after hatching. These vaccines prevent birds from developing disease symptoms, but do not prevent these hosts from becoming infected, or block

transmission of the virus (8–10). The virulence of MDV-1 has risen in the last 40 years, which has been attributed to changes in farming practices, as well as widespread vaccination (1, 11, 9, 10). Despite both clinical and laboratory data that demonstrate increased virulence in recent field isolates of MDV-1, the genetics underlying MDV-1 evolution into more virulent forms is not well understood. Understanding MDV-1 evolution in the field would provide new insight into future evolution of this pathogen and facilitate precautionary measures to prevent outbreaks. A few genes such as *Meq*, *UL36*, and *ICP4* have been associated with MDV-1 pathogenicity, however, very little is known about their interaction partners during infection, or if these are the only genes involved in the evolution of increased virulence (12).

Remarkably, our understanding of MDV-1 genomics and genetic variation comes exclusively from the study of 10 different laboratory-grown strains (13–20). Most herpesviruses share this limitation, where the large genome size and need for high-titer samples has led to a preponderance of genome-studies being done with cultured virus, instead of clinical or field samples (21–27). MDV-1 isolates tend to lose virulence with increasing passage number *in vitro* (28, 29), as has been found for other herpesviruses such as herpes simplex virus and human cytomegalovirus (24, 30). This raises concerns about the ability of cultured strains to accurately reflect the genetic basis of virulence in wild circulating strains. Recent applications of next-generation sequencing (NGS) have demonstrated that herpesvirus genomes can be captured from human clinical samples using genome amplification techniques such as oligonucleotide enrichment, and PCR-based approaches (31–36). The rising virulence of MDV in the field, combined with these new approaches in next-generation sequencing of direct field samples, will enable new insights into the genetic basis of rising virulence in circulating wild strains.

NGS approaches have the potential to reveal how genetic variation impacts the natural ecology of MDV-1 in the field by identifying new genetic markers that correlate with increased virulence, detecting loci that show allelic variation over time, and evaluating the extent of standing variation in the field. The deep sequencing aspect of NGS makes it possible to sample many members of a viral population, rather than just the dominant member. Large outputs generated through NGS allow the analysis of genome-wide variations with higher confidence than was possible with traditional approaches such as, restriction fragment length polymorphism (RFLP) analysis and Sanger sequencing of individual genes. There is growing evidence for sequence polymorphisms in large DNA virus genomes. Recent studies on human cytomegalovirus (HCMV), a betaherpesvirus, have shown that populations of HCMV in human patients can have levels of diversity that are comparable to RNA viruses such as dengue virus (DENV) and HIV (33, 34, 37, 38). The potential for MDV to harbor limited heterogeneity has been previously suggested in a serial passage study of cultured MDV-1 (28). Polymorphic populations allow viruses to adapt to diverse environments and withstand changing selective pressures, such as evading the host immune system, adapting to different tissue compartments, and facilitating transmission between hosts (25, 32–34, 39–41). Drug resistance and vaccine failure have also been attributed to the variation present in viral populations (32, 40, 41). The ability to capture and sequence viral genomes directly from host infections and sites of transmission will be crucial to decipher when and where variations arise, and which one(s) spread into future host generations.

Here we present a method for the enrichment and isolation of viral genomes from poultry dust and feather tips. Poultry dust is the source of transmitted infections, while feather follicle epithelial cells are the only sites of fully productive virus replication. Deep sequencing of viral DNA from these two materials enabled us to observe, for the first time, the complete genome of MDV-1 directly from field samples. A subsequent comparison of these genomes provided our first view of variation between source farms and individual birds. A further analysis of the rare polymorphisms within each sample provided new insights into the potential for within-sample variation and competition in the field. The MDV-1 isolation technique developed here is highly effective in terms of purity, speed, and cost. When combined with suitable computational tools, this method can be used to obtain full-length genomes of wild-type MDV-1 from diverse field samples. This presents an unprecedented level of detail into the viral genomes that are shed from infected hosts. As has been done with varicella zoster virus (VZV) vesicles in human patients (32, 41), we can now study whether virus found in different body sites or individual feathers harbors unique genetic variations. These approaches will reveal the genetic variability of MDV-1 that is present in poultry farms, allow us to map viral distribution and spread, and aid in the identification of markers associated with virulence and vaccine resistance. The extension of these methods to other field and clinical samples may enable similar new directions for human herpesvirus infections.

## **Methods**

### **Collection of poultry dust and feathers**

Two commercial-scale farms in central Pennsylvania (11 miles apart) were chosen for this study due to a high incidence of MDV-1 (**Figure 1A**). These operations raise broiler birds, housing approximately 25,000-30,000 individuals per poultry house. The poultry on these farms were vaccinated with bivalent vaccine composed of MDV-2 (strain SB-1) + HVT (strain FC126), which allowed us to distinguish wild MDV-1 from concomitant shedding of vaccine strains. These farms do not use the Rispens vaccine, which is derived from MDV-1. Poultry dust samples were collected into 1.5 ml tubes from fan louvers. This location contains less moisture and contaminants than floor-collected samples, and represents a mixture of air-borne virus particles and feather dander. Sequential samples from Farm A (Table 1) were collected 11 months apart, from adjacent buildings on the same farm (**Figure 1A**).

Feathers were collected at animal maturity and just prior to processing for sale, to maximize the potential for infection and high viral titer. At the time of collection the animals were ~12-weeks old. Ten birds were chosen randomly throughout the entirety of each house for feather collection. Two feathers from each bird were collected from the axillary track (breast feathers). One feather from each bird was tested for the presence and quantity of MDV-1 present (see below for quantitative PCR details). The remaining feather from the two birds with highest apparent MDV-1 titer were used for a more thorough DNA extraction (see below for details) and next-generation sequencing. Animal procedures were approved by the Institutional Animal Care and Use Committee of the Pennsylvania State University (IACUC Protocol#: 46599).

## **Viral DNA isolation from poultry dust**

MDV nucleocapsids were isolated from poultry dust as indicated in **Figure 2A**. Dust collected from poultry houses was stored in 50 ml polypropylene Falcon<sup>®</sup> tubes (Corning) at 4°C until required. 500 mg of poultry dust was suspended in 6.5 ml of 1X phosphate buffered saline (PBS). The mixture was vortexed vigorously until homogenous and centrifuged at  $2000 \times g$  for 10 minutes. This supernatant was agitated on ice for 30 sec. using a Sonica Ultrasonic Processor Q125 (probe sonicator with 1/8<sup>th</sup> inch microtip) set to 20% amplitude. It was then vortexed before being centrifuged for a further 10 minutes at  $2000 \times g$ . This supernatant (approximately 5 ml in volume) was introduced to a 5 ml syringe and pushed through a 0.8  $\mu$ M Corning<sup>®</sup> surfactant-free cellulose acetate (SFCA) filter that had been soaked overnight in fetal bovine serum (FBS). The flow-through was then passed through a Millipore Express<sup>®</sup> PLUS Membrane (0.22  $\mu$ M) vacuum filter and the membrane subsequently washed twice with 2.5 ml of PBS. The resulting flow-through (approximately 10 ml in volume) was treated with DNase (Sigma) at a concentration of 0.1 mg/ml for 30 minutes at room temperature. The MDV nucleocapsids present in the DNase-treated solution were captured on a 0.1  $\mu$ M polyethersulfone (PES) membrane (VWR). An increased MDV purity, but ultimately reduced total nanograms of DNA yield, may be achieved by washing this membrane once with 2.5 ml PBS (see Supplemental Tables S1-S3). The membrane was then carefully excised using a sterile needle and forceps, and laid – exit side downwards – in a sterile 5 cm diameter plastic petri-dish where it was folded twice lengthwise. The “rolled” membrane was then placed into a 2 ml micro-tube containing 1.8 ml of lysis solution (ATL buffer and Proteinase K from the DNeasy<sup>®</sup> Blood and Tissue kit, Qiagen). Digestion was allowed to proceed at 56°C for 1 hour on an incubating microplate shaker (VWR) set to 1100 rpm. The membrane was then removed, held vertically over a tilted sterile 5 cm



diameter plastic petri-dish and washed with a small volume of the lysis solution (from the 2 ml micro-tube). This wash was subsequently returned to the 2 ml micro-tube and the tube replaced on the heated shaker where it was allowed to incubate overnight. The following day, the DNA was isolated as per manufacturer's instructions using the DNeasy<sup>®</sup> Blood and Tissue kit (Qiagen). DNA was eluted in 200 µl DNase-free water. Ten to fourteen aliquots of 500 mg each were used to obtain sufficient DNA for each dust sample (see Supplemental Tables S1-S3).

# **Isolation of viral DNA from feather follicles**

Individual feathers were plucked from the breast region and the distal 0.5-1.0 cm proximal shaft (feather tip, which contains the feather pulp) was snipped into a sterile 1.5 ml micro-tube containing a single sterile 5 mm steel bead (Qiagen). On return to the laboratory, tubes were stored at -80°C until processing. Each tube containing a single feather tip was allowed to thaw, and then 200 µl of PBS was added and the sample bead-beaten for 30 seconds at 30 Hz using a TissueLyser (Qiagen) (**Figure 2B**). A further 720 µl of PBS and 80 µl of 2.5 mg/ml trypsin (Sigma) were then added (final trypsin concentration: 0.8 mg/ml), and the solution was transferred to a new sterile 2 ml micro-tube. Digestion was allowed to proceed for 2 hours at 37°C on an incubating microplate shaker (VWR) set to 700 rpm. The suspension was then sonicated on ice for 30 seconds using a Sonica Ultrasonic Processor Q125 (probe sonicator with 1/8<sup>th</sup> inch microtip) set to 50% amplitude. DNase I was added to a final concentration of 0.1 mg/ml and allowed to digest for 1 hour at room temperature. An equal volume of lysis solution (ATL buffer and Proteinase K from the DNeasy<sup>®</sup> Blood and Tissue kit, Qiagen) was added and the sample was incubated over night at 56°C on an Incubating Microplate Shaker (VWR) set to

1100 rpm. The following day, the DNA was isolated as per manufacturer's instructions using the DNeasy<sup>®</sup> Blood and Tissue kit (Qiagen).

# **Measurement of total DNA and quantification of viral DNA**

The total amount of DNA present in the samples was quantified by fluorescence analysis using a Qubit<sup>®</sup> fluorescence assay (Invitrogen) following the manufacturer's recommended protocol. MDV genome copy numbers were determined using serotype-specific quantitative PCR (qPCR) primers and probes, targeting either the MDV-1 pp38 (LORF14a) gene or MDV-2 (SB-1 strain) DNA polymerase (DNA-Pol) gene. The MDV-1 assay was designed by Sue Baigent: forward primer (Spp38for) 5'-GAGCTAACCGGAGAGGGAGA-3'; reverse primer (Spp38rev) 5'-CGCATACCGACTTTCGTCAA-3'; probe (MDV-1) 6FAM-CCCACTGTGACAGCC-BHQ1 (S. Baigent, *pers. comm.*). The MDV-2 assay is that of Islam et al. (42), but with a shorter MGB probe in place of their BHQ-2 probe (6FAM-GTAATGCACCCGTGAC-MGB). Real-time quantitative PCRs were performed on an ABI Prism 7500 Fast System with an initial denaturation of 95°C for 2 minutes followed by 40 cycles of denaturation at 95°C for 3 seconds and annealing and extension at 60°C for 30 seconds. Both assays included 4 µl of DNA in a total PCR reaction volume of 20 µl with 1X PerfeCTa<sup>™</sup> qPCR FastMix<sup>™</sup> (Quanta Biosciences), forward and reverse primers at 300 nM and TaqMan<sup>®</sup> BHQ (MDV-1) or MGB (MDV-2) probes (Sigma and Life Sciences, respectively) at 100 nM and 200 nM, respectively. In addition each qPCR reaction incorporated 2 µl BSA (Sigma). Absolute quantification of genomes was based on a standard curve of serially diluted plasmids cloned from the respective target genes. The absolute quantification obtained was then converted to concentration. The concentration of total DNA present was calculated using a Qubit<sup>®</sup> fluorometer. Once the concentration of the

total DNA, MDV-1, and MDV-2 DNA present in the sample were known, we calculated the percentage of MDV-1 and MDV-2 genomic DNA in the total DNA pool (see Supplemental Tables S1-S4).

### **Illumina next-generation sequencing**

Sequencing libraries for each of the isolates were prepared using the Illumina TruSeq Nano DNA Sample Prep Kit, according to the manufacturer's recommended protocol for sequencing of genomic DNA. Genomic DNA inputs used for each sample are listed in **Table 1**. The DNA fragment size selected for library construction was 550 base pairs (bp). All the samples were sequenced on an in-house Illumina MiSeq using version 3 sequencing chemistry to obtain paired-end sequences of  $300 \times 300$  bp. Base calling and image analysis was performed with the MiSeq Control Software (MCS) version 2.3.0.

### **Consensus genome assembly**

As our samples contained many more organisms than just MDV, we developed a computational workflow to preprocess our data prior to assembly. A local BLAST database was created from every *Gallid herpesvirus* genome available in GenBank. All sequence reads for each sample were then compared to this database using BLASTN (43) with a loose e-value less than or equal to  $10^{-2}$  in order to computationally enrich for sequences related to MDV. These "MDV-like" reads were then processed for downstream genome assembly.

MDV genomes were assembled using the viral genome assembly VirGA (44) workflow which combines quality control preprocessing of reads, *de novo* assembly, genome linearization and annotation, and post-assembly quality assessments. For the reference-guided portion of viral genome assembly in VirGA, the Gallid herpesvirus 2 (MDV-1) strain MD5 was used (GenBank Accession: NC\_002229). These new genomes were named according to recent recommendations, as outlined by Kuhn et al (45). We use shortened forms of these names throughout the manuscript (see Table 1 for short names). The full names for all five genomes are as follows: MDV-1 *Gallus domesticus*-wt/Pennsylvania, USA/2015/Farm A-dust 1; MDV-1 *Gallus domesticus*-wt/Pennsylvania, USA/2015/Farm A-dust 2; MDV-1 *Gallus domesticus*-wt/Pennsylvania, USA/2015/Farm B-dust; MDV-1 *Gallus domesticus*-wt/Pennsylvania, USA/2015/Farm B-feather 1; MDV-1 *Gallus domesticus*-wt/Pennsylvania, USA/2015/Farm B-feather 2.

# **Between-sample: consensus genome comparisons**

Clustalw2 (43) was used to construct pairwise global nucleotide alignments between whole genome sequences, and pairwise global amino acid alignments between open reading frames. These alignments were utilized by downstream custom Python scripts to calculate percent identity, protein differences, and variation between samples.

The proline-rich region of MDV049, which contains an extended array of tandem repeats of the amino acids PQ, was removed from all five consensus genomes prior to comparison. The amount of polymorphism seen in this region of MDV049 is driven by fluctuations in the length of these tandem repeats, as has been seen in prior studies with other alphaherpesviruses such as HSV,

VZV, and pseudorabies virus (PRV) (32,48–50). Since the length of extended arrays of perfect repeats cannot be precisely determined by *de novo* assembly (21, 22, 25, 26), we excluded this region from pairwise comparisons of genome-wide variation.

### **Within-sample: polymorphism detection within each consensus genome**

VarScan v2.2.11 (48) was used to detect variants present within each consensus genome. To aid in differentiating true variants from potential sequencing errors (49), two separate variant calling analyses were explored. (41). Our main polymorphism-detection parameters (used in Figures 4-5 and Supplemental Tables S5-S6) were as follows: minimum variant allele frequency  $\geq 0.02$ ; base call quality  $\geq 20$ ; read depth at the position  $\geq 10$ ; independent reads supporting minor allele  $\geq 2$ . Directional strand bias  $\geq 90\%$  was excluded; a minimum of two reads in opposing directions was required. For comparison and added stringency, we also explored a second set of parameters (used in Supplemental Figure S2): minimum variant allele frequency  $\geq 0.05$ ; base call quality  $\geq 20$ ; read depth at the position  $\geq 100$ ; independent reads supporting minor allele  $\geq 5$ . Directional strand bias  $\geq 80\%$  was excluded. The variants obtained from VarScan were then mapped back to the genome to understand their distribution and mutational impact using SnpEff and SnpSift (50, 51). Polymorphisms in the proline-rich region of MDV049 were excluded, as noted above.

### **Testing for signs of selection acting on polymorphic viral populations**

For each of our five consensus genomes, which each represent a viral population, we classified the polymorphisms detected into categories of synonymous, non-synonymous, genic-untranslated, or intergenic, based on where each polymorphism was positioned in the genome.

For these analyses (Figure 5), we were only able to include polymorphisms detected in the three dust genomes, since the total number of polymorphisms obtained from feather genomes was too low for chi-square analysis. First, we calculated the total possible number of single nucleotide mutations that could be categorized as synonymous, non-synonymous, genic-untranslated or intergenic. To remove ambiguity when mutations in overlapping genes could be classified as either synonymous or non-synonymous, genes with alternative splice variants or overlapping reading frames were excluded from these analyses. This removed 25 open reading frames (approximately 21% of the genome). This tally of potential mutational effects constituted the expected number of mutations in each category. We performed chi-squared tests on each dataset to assess whether the observed distribution of polymorphisms matched the expected distribution. We also performed a similar analysis in pairwise fashion (**Supplemental Table S6**), to assess whether the fraction of variants differed from what would be expected by random chance. Pairwise combinations included the following: synonymous vs. non-synonymous, synonymous vs. intergenic, synonymous vs. genic-untranslated, non-synonymous vs. intergenic, non-synonymous vs. genic-untranslated, and intergenic vs. genic-untranslated. Statistically significant outcomes would suggest that recent or historical selection differed between those categories of variants.

### **Sanger sequencing of polymorphic locus in ICP4**

A potential locus of active selection within the ICP4 (MDV084) gene was detected during deep-sequencing of Farm B-dust. This locus was examined using Sanger sequencing. An approximately 400 bp region of the ICP4 gene was amplified using a Taq PCR Core Kit (Qiagen) and the following primers at 200 nM: forward primer (ICP4self)

5' AACACCTCTTGCCATGGTTC 3'; reverse primer (ICP4selR)  
5' GGACCAATCATCCTCTCTGG 3'. Cycling conditions included an initial denaturation of 95°C for 2 minutes, followed by 40 cycles of denaturation at 95°C for 30 seconds, annealing at 55°C for 30 seconds and extension at 72°C for 1 minute, with a terminal extension at 72°C for 10 minutes. The total reaction volume of 50 µl included 10 µl of DNA and 4 µl BSA (final concentration 0.8 mg/ml). Amplification products were visualized on a 1.5% agarose gel, the target amplicon excised and then purified using the E.Z.N.A. Gel Extraction Kit (Omega Bio-tek). Sanger sequencing was performed by the Penn State Genomics Core Facility utilizing the same primers as used for DNA amplification. The relative peak height of each base call at the polymorphic position was analyzed using the ab1PeakReporter tool (52).

### **Genetic distance and dendrogram**

Multiple sequence alignments of complete MDV-1 (*Gallid herpesvirus 2*) genomes from GenBank (13, 16–20, 53–55) and those assembled by our lab were generated using MAFFT (56). The evolutionary distances were computed using the Jukes-Cantor method (57) and the evolutionary history was inferred using the neighbor-joining method (58) in MEGA6 (59), with 1,000 bootstrap replicates (60). Positions containing gaps and missing data were excluded.

### **Taxonomic estimation of non-MDV sequences in poultry dust and feathers**

All sequence reads from each sample were submitted to a quality control preprocessing method to remove sequencing primers, artifacts, and areas of low confidence (44). Sequence annotation was performed using a massively iterative all-vs.-all BLASTN (E-value  $10^{-2}$ ) approach using the

all-nucleotide-database from NCBI. Only a portion of the total sequence read pool could be identified with confidence using this method. We then used *de novo* assembly to extend the length of these unidentified sequences, therefore elongating them into contigs. These were iterated through BLASTN again, which revealed alignment to repetitive regions of the *Gallus domesticus* (chicken) genome. Since the viral DNA enrichment procedures include a level of stochasticity in removal of host and environmental contaminants, the proportion of taxa present is not a definitive outline of those present initially. The results of these classifications are shown in **Supplemental Figure S3** and listed in **Supplemental Table S7**.

## Results and Discussion

### Enrichment of capsids and isolation of viral DNA from poultry dust and feathers

Field samples containing MDV were collected from poultry dust and feathers of two large-scale agricultural operations (>25,000 animals; **Figure 1A**). In pilot DNA extractions, we found that poultry dust contained less than 0.04% MDV-1 DNA, and feather follicles contained less than 1% (data not shown). We thus developed a protocol that used the proteinaceous C-type capsid of MDV to protect the viral DNA during initial enrichment from the milieu of environmental source material (**Figure 2**) (61). Due to the complexity of contaminating environmental sources of DNA, enrichment of viral DNA from poultry dust involved a more extensive procedure than that required for feathers (**Figure 2A vs. 2B**). Initial steps in the isolation of capsids from the poultry dust were important for the release of cell-associated virus into the supernatant. Vortexing distributed the dust into solution and aided in the release of virions from the cells. Centrifugation allowed large dust particles to sediment out, leaving a portion of virus in solution. Sonication of



the resulting supernatant further aided in release of virus. A second round of centrifugation removed additional particulates from the supernatant. To enrich viral capsids away from the remaining contaminants, we then utilized a series of filtration techniques. First we passed the supernatant through a 0.8  $\mu\text{m}$  filter, to filter out dust particles, host cells and bacteria. The flow-through was then passed through a 0.22  $\mu\text{m}$  filter, to remove additional bacteria and fungal spores. Next we treated the flow-through from the 0.22  $\mu\text{m}$  filter with DNase, to remove contaminant DNA. In the absence of DNase treatment we observed a higher yield of viral DNA, but with much lower purity (data not shown). Finally the DNase-treated suspension was passed over a 0.1  $\mu\text{m}$  filter. This filter membrane trapped the viral nucleocapsids, which are between 0.1-0.2  $\mu\text{m}$  (62). The filter membrane with trapped virions was excised and digested to open the capsids and release the DNA. Quantitative PCR was used to assess the copy number of viral genomes in the resulting DNA. Total yield and percent MDV-1 vs. MDV-2 DNA are listed in **Supplemental Tables S1-S3**. When the captured capsids were washed with PBS before excising the membrane, the percent MDV DNA in the total DNA pool increased, while the total DNA yield decreased. In the future, samples with a higher percentage of MDV DNA could be obtained by applying these wash steps to all components of the sample pool.

A different protocol was developed for extraction of MDV DNA from feather follicles, to accommodate both the smaller input material and our expectation of higher purity (**Figure 2B**). Sequential size filters were not used to filter out contaminants from feather follicles as these direct host samples have fewer impurities than the environmental samples of poultry dust. However, the feather follicle cells were encased inside the keratinaceous shell of the feather tip, which required disruption to release the cells. Vigorous bead-beating achieved the desired

destruction of the follicle tip. Next, the feather follicle cells were digested with trypsin to remove the extracellular matrix and to dissociate cells. This suspension was then sonicated to release cell-associated virus, and it was treated with DNase to remove non-encapsidated DNA. Finally, the remaining viral capsids were digested to release the DNA. While the overall amount of DNA obtained from feather follicles was lower than that obtained from pooled dust samples (**Supplemental Table S4**), it was of higher purity and was sufficient to generate libraries for sequencing (**Table 1**, lines 1-3).

### **Sequencing and assembly of wild MDV-1 genomes**

A total of five uncultured wild-type samples of MDV were sequenced on an in-house Illumina MiSeq sequencer (**Table 1**, lines 4-6; see **Methods** for details). Following the nomenclature conventions for viral field isolates, we have named these MDV-1 genomes according to location and sample type (see **Methods** for full isolate name). Here we use shortened names for clarity, e.g. Farm A-dust 1 (**Table 1**). The farms from which we sourced these samples use a bivalent vaccine composed of HVT and MDV-2 strain SB-1. These farms do not use Rispen, which is an alternative vaccine derived from attenuation of MDV-1. The use of bivalent vaccine made it possible for us to readily distinguish sequence reads that resulted from the shedding of virulent MDV-1 vs. vaccine virus (MDV-2 or HVT) strains. The overall DNA identity of MDV-1 and MDV-2 is just 61% (4). In a comparison of strains MDV-1 Md5 (NC\_002229) and MDV-2 SB-1 (HQ840738), we found no spans of identical DNA greater than 50 bp (data not shown). This allowed us to accurately distinguish these 300 x 300 bp MiSeq sequence reads as being derived from either MDV-1 or MDV-2. After deep sequencing, a BLAST-based filter step was used to computationally enrich MDV-like sequence reads, separating them from the many contaminants

in the poultry dust samples (**Supplemental Figure 1**). These sequences were then further separated into MDV-1-like sequences or MDV-2 like sequences.

The sequence read data derived from poultry dust contained approximately 2-5% MDV-1 DNA, while the feather samples ranged from ~27%-48% MDV-1 (**Table 1**, line 6). Although the two feathers had different proportions of MDV-1 before sequencing (**Table 1**, line 4), approximately half of the sequencing output was MDV-1 specific for each sample (**Table 1**, line 6). Enrichment of MDV-1 specific sequences may be a result of steps involved in the preparation of genomic DNA for sequencing. The shearing of genomic DNA was optimized using MDV DNA, which may have favored the removal of sub-optimally sheared contaminant DNA during subsequent size selection steps. Based on these results, we concluded that feathers were a better source of MDV-1 DNA than poultry dust. However, since poultry dust represents the infectious material that transmits MDV from host to host, and across generations of animals that pass through a farm or field site, we pursued analysis of wild MDV genomes from both types of source material.

# **Annotation of new MDV-1 consensus genomes from the field**

Consensus genomes were created for each of the five samples in **Table 1**, using a recently described combination of *de novo* assembly and reference-guided alignment of large sequence blocks, or contigs (44). Like other alphaherpesviruses, MDV genomes have a class E organization (**Figure 3A**) that consists of unique long (UL) and unique short (US) regions (63, 64). Each unique region is flanked by inverted repeats, which are named according to their position (terminal, T, vs. internal, I), and whether they flank the unique long (L) or short (S) region (TRL, IRL, TRS, IRS; see **Figure 3A** for illustration). Nearly complete genomes were

obtained for all five samples (**Table 1**). The coverage depth for each genome was directly proportional to the number of MDV-1 specific reads obtained from each sequencing library (**Table 1**, line 5,7). The poultry dust sample from Farm B had the highest coverage depth, at an average of almost 600X across the viral genome. Feather 1 from Farm B had the lowest coverage depth, averaging 44X genome-wide, which still exceeds that of most bacterial or eukaryotic genome assemblies. The genome length for all 5 samples was approximately 180 kilobases (**Table 1**), which is comparable to all previously sequenced MDV-1 isolates (13, 15–20, 54).

For each field sample collected and analyzed here, we assembled a consensus viral genome. We anticipated that the viral DNA present in a single feather follicle might be homotypic, based on similar results found for individual vesicular lesions of VZV (32, 41). We further expected that the genomes assembled from a poultry dust sample would represent a mix of viral genomes, summed over time and space. Viral genomes assembled from poultry dust represent the most common genome sequence, or alleles therein, from all of the circulating MDV-1 on a particular farm. Our subsequent analyses included both a comparison between the consensus genomes, and a search for variability within the viral population that was compiled into each consensus genome. The comparison of consensus genomes provided a view into the amount of sequence variation between Farm A and Farm B, or between two birds on the same Farm (**Table 2**). In contrast, examining the polymorphic loci within each consensus genome assembly allowed us to observe the level of variation within the viral population at each point source (**Table 3, Figures 4-5**).

## **DNA and amino acid variations between five new field genomes of MDV-1**

We began our assessment of genetic diversity by determining the extent of DNA and amino acid variations between the five different consensus genomes. We found that the five genomes are highly similar to one another at the DNA level, with the percent homology ranging from 99.4% to 99.9% in pairwise comparisons (**Table 2**). These comparisons used a trimmed genome format (**Figure 3B**) where the terminal repeat regions had been removed, so that these sequences were not over-represented in the analyses. The level of identity between samples is akin to that observed in closely related isolates of HSV-1 (44). Observed nucleotide differences were categorized as genic or intergenic, and further sub-divided based on whether the differences were insertions or deletions (INDELs) or single-nucleotide polymorphism (SNPs) (**Table 2**). The number of nucleotide differences was higher in intergenic regions than in genic regions for all genomes. For the INDEL differences, we also calculated the minimum number of events that could have led to the observed differences, to provide context on the relative frequency of these loci in each genome. We anticipate that these variations include silent mutations, as well as potentially advantageous or deleterious coding differences.

To understand the effect(s) of these nucleotide variations on protein coding and function, we next compared the amino acid (AA) sequences of all open reading frames (ORFs) for the five isolates. The consensus protein coding sequences of all five isolates were nearly identical, with just a few differences (**Table 2**). In comparison to the other four samples, Farm B-dust harbored AA substitutions in four proteins. A single non-synonymous mutation was seen in each of the following: the lipase MDV010, the unknown protein MDV012, and the probable membrane protein MDV056. A single synonymous mutation was observed in the DNA helicase-primase

protein MDV020. Finally, a 66 AA insertion unique to Farm B-dust was observed in the DNA polymerase processivity subunit protein MDV055. We did not observe any coding differences between temporally separated dust isolates from Farm A or between feather isolates from different hosts in Farm B, although both of these comparisons (Table 2, bottom) revealed hundreds of noncoding differences. The fact that any coding differences were observed in this small sampling of field viruses suggests that the natural ecology of MDV-1 may include drift and adaptation in protein function, in addition to genetic drift.

#### **Detection of polymorphic bases within each genome**

Comparing viral genomes found in different sites provides a macro-level assessment of viral diversity. We next investigated the presence of polymorphic viral populations within each consensus genome, to reveal how much diversity might exist within a farm (as reflected in poultry dust genomes) or within a single host (as reflected in feather genomes). For each consensus genome, we used polymorphism detection analysis to examine the depth and content of the sequence reads at every nucleotide position in each genome (see **Methods** for details). Rather than detecting differences between isolates, as in **Table 2**, this approach revealed polymorphic sites within the viral population that contributed to each consensus genome. We detected 2-58 polymorphic sites within each consensus genome (**Figure 4**). The feather genomes had a lower number of polymorphisms as compared to the dust genomes, which may be attributable to their relatively low sequence coverage. Since INDELs were not included in this polymorphism analysis, but clearly contributed to between-sample variation (**Table 2**), this may be an underestimate of the overall amount of within-sample variation. Viral polymorphisms were distributed across the entire length of the genome (**Figure 4**), with the majority concentrated in

the repeat regions. Application of a more stringent set of parameters (see **Methods** for details) yielded a similar distribution of polymorphisms, albeit with no polymorphisms detected in feather samples due to their lower depth of coverage (**Supplemental Figure S2**). These data reveal that polymorphic alleles are present in field isolates, including in viral genomes collected from single feather tips.

To address the potential effect(s) of these polymorphisms on MDV biology, we categorized the observed polymorphisms into categories of synonymous, non-synonymous, genic-untranslated, or intergenic (**Supplemental Table S5**). The majority of all polymorphisms were located in intergenic regions (**Figure 4**). We next investigated whether evidence of selection could be detected from the distribution of polymorphisms in our samples. One way to assess this is to determine whether the relative frequencies of synonymous, non-synonymous, genic-untranslated, and intergenic polymorphisms can be explained by random chance. If the observed frequencies differ from those expected from a random distribution, it would suggest genetic selection. After calculating the expected distribution in each sample (as described in **Methods**), we determined that the distribution of variants differed from that expected by chance in each of our dust samples (**Figure 5**, Farm A-Dust 1:  $\chi^2=68.16$ , d.f.=3,  $p<0.001$ ; Farm A-Dust 2:  $\chi^2=128.57$ , d.f.=3,  $p<0.001$ ; Farm B-Dust 1:  $\chi^2=63.42$ , d.f.=3,  $p<0.001$ ). In addition, we found in pairwise tests that the number of observed intergenic polymorphisms was significantly higher than the observed values for other categories (**Table S6**). This suggests that the mutations that occurred in the intergenic regions were better tolerated and more likely to be maintained in the genome.

## Tracking shifts in polymorphic loci over time

In addition to observing polymorphic SNPs in each sample at a single moment in time, we explored whether any shifts in polymorphic allele frequency were detected in the two sequential dust samples from Farm A. We found one locus in the ICP4 (MDV084) gene (nucleotide position 5,495) that was polymorphic in the Farm A-dust 2 sample, with nearly equal proportions of sequence reads supporting the major allele (C) and the minor allele (A) (**Figure 6A**). In contrast, this locus had been 99% A and only 1% C in Farm A-dust 1 (collected 11 months earlier), such that it was not counted as polymorphic in that sample by our parameters (see **Methods** for details). At this polymorphic locus, the nucleotide C encodes a serine, while nucleotide A encodes a tyrosine. The encoded AA lies in the C-terminal domain of ICP4 (position AA1832). ICP4 is an important immediate-early protein in all herpesviruses, where it serves as a major regulator of viral transcription (65). The role of ICP4 in MDV pathogenesis is also considered crucial because of its proximity to the latency associated transcripts (LAT) and recently described miRNAs (12).

We examined dust samples from Farm A over a period of 9 months, observing variation at this ICP4 locus using Sanger sequencing (**Figure 6B**). We found that this locus was highly polymorphic in time-separated dust samples. The C (serine) allele was present in different proportions at different time points. In four of the dust samples the major allele switched from C (serine) to A (tyrosine). This reversible fluctuation in allele frequencies over a short period of time is unprecedented for alphaherpesviruses. However, recent studies on HCMV have shown that selection can cause viral populations to evolve in short period of times (33, 34). While this is only one example of a polymorphic locus that shifts in frequency over time, similar approaches



could be used at any of the hundreds of polymorphic loci detected here (**Supplemental Table S5**). This combination of deep-sequencing genomic approaches to detect new polymorphic loci, and fast gene-specific surveillance to track changes in SNP frequency over a larger number of samples, provides a powerful new approach for field ecology.

### **Comparison of field isolates of MDV-1 to previously sequenced isolates**

To compare these new field-based MDV genomes to previously sequenced isolates of MDV, we created a multiple sequence alignment of all available MDV-1 genomes (13, 16–20, 53–55). The multiple sequence alignment was used to generate a dendrogram depicting genetic relatedness (see **Methods**). We observed that the five new isolates form a separate group when compared to all previously sequenced isolates (**Figure 7**). This may result from geographic differences as previously seen for HSV-1 and VZV (66–69, 26), or from temporal differences in the time of sample isolations, or from the lack of cell-culture adaptation in these new genomes. In this dendrogram, all of the isolates from USA form a separate group, relative to the European and Chinese MDV-1 genomes. Within the USA cluster, a separate group was formed by the five new isolates. No prior MDV-1 genomes were available from Pennsylvania, so this separation may well result from geographic separation. Further MDV-1 genomes, representing wider geographic diversity and additional uncultured field-derived genomes, will be needed to distinguish which of these has a greater impact on the observed clustering.

## **Assessment of taxonomic diversity in poultry dust and chicken feathers**

As noted in **Table 1**, only a fraction of the reads obtained from each sequencing library were specific to MDV-1. We analyzed the remaining sequences to gain insight into the taxonomic diversity found in poultry dust and chicken feathers. Since our enrichment for viral capsids removed most host and environmental contaminants, the taxa observed here represent only a fraction of the material present initially. However it provides useful insight into the overall complexity of each sample type. The results of the classification for Farm B- dust, Farm B-feather 1, and Farm B-feather 2 are shown in **Supplemental Figure 3**. We divided the sequence reads by the different kingdoms they represent. Complete lists of taxonomic diversity for all samples to the family level are listed in **Supplemental Table S7**. As expected, the taxonomic diversity of poultry dust is greater than that of feather samples. The majority of sequences in the dust samples mapped to the chicken genome, and only about 2-5% were MDV specific (see also **Table 1**, line 6). We found that single feathers were a better source of MDV DNA, due to their reduced level of taxonomic diversity and higher percentage of MDV-specific reads (**Table 1**, line 6 and **Supplemental Figure 3**).

## **Conclusions**

This study presents the first-ever description of MDV-1 genomes sequenced directly from a field setting. This work builds on recent efforts to sequence VZV and HCMV genomes directly from human clinical samples, but importantly the approaches presented here do not employ either the oligo-enrichment used for VZV or the PCR-amplicon strategy used for HCMV (32, 34, 36, 41, 70). This makes our technique accessible to a wider number of labs and reduces the potential

methodological bias. We compared these genomes to one another, and to previously sequenced isolates of MDV, at the level of consensus genomes. We further explored the potential for variation within each consensus genome, by searching for minority variants that were hidden beneath the dominant majority allele found in the consensus genome. Our time-series exploration of one such locus in ICP4 demonstrates the power of combining NGS approaches with rapid single-gene analysis of a large number of field samples.

Together, these data and approaches provide powerful new tools to measure viral diversity in field settings, and to track changes in pathogen populations over time in the field. For instance, these approaches can be used to guide targeted surveillance of one or more sites of variation in the viral genome, with a personalized approach that is tailored to match the variations circulating in a given area. In the case of MDV-1, this could be used to track viral spread across a geographic area, or between multiple end-users associated with a single parent corporation (**Figure 1B**). It could also be used as part of a public-health or animal-health program, for instance to guide management decisions on how to limit pathogen spread or accurately contain airborne pathogens such as MDV-1. For the poultry industry, and in human health, host resistance to a given pathogen is a major area of interest. The ability to sequence and compare large viral genomes directly from individual hosts and field sites will allow a new level of interrogation of host-virus fitness interactions (**Figure 1B**). Finally, analysis of viral genomes from single feather follicles, as from single VZV vesicles, enable our first insights into naturally-occurring within-host variations for these pathogens (**Figure 1B**). For MDV-1, we can now address whether the virus found in the spleen, which has traditionally been used as the source of lab-grown viral stocks and prior MDV-1 genome sequencing, is genetically identical to that shed

from the feather follicle epithelium. Evidence from tissue compartmentalization studies in HCMV suggests that viral genomes differ in distinct body niches (34, 36). If the same were true for MDV-1, it would suggest that prior studies of spleen-derived virus may not fully reflect the virus that is shed from feather-follicle epithelia and transmitted to new hosts.

Our comparison of new field-isolated MDV-1 genomes revealed a distinct genetic clustering of these genomes, separate from other previously sequenced MDV-1 genomes (**Figure 7**). We cannot yet distinguish whether this pattern results more from geographic and temporal drift in these strains, or from the genetic adaptation(s) to tissue culture, which has been used to propagate the virus for all previously genome sequencing MDV-1 efforts. Prior studies have shown that when MDV is passaged for multiple generations in cell-culture, the virus accumulated a series of mutations, including several that affected virulence (28). The same is true for the betaherpesvirus HCMV (24). Cultured viruses can undergo bottlenecks during initial adaptation to cell culture, and they may accumulate variations by genetic drift or positive selection during the passaging required to grow stocks or prepare DNA for sequencing. We thus anticipate that these field-isolated viral genomes more accurately reflect the genomes of wild MDV-1 that are circulating in the field. The observed genetic distance of the new field MDV genomes is also likely influenced by geographic and temporal separation. The impact of geography on the genetic relatedness of herpesvirus genomes has been previously shown for related alphaherpesviruses such as VZV and HSV-1 (66–69, 26). Phenomena such as recombination can have an impact on clustering pattern of MDV isolates. It is worth noting that the genetic distance dendrogram constructed here included genomes from isolates that were collected over a 40 year span (13, 16–20, 53–55). Agricultural and farming practices have

evolved significantly during this time, and we presume that pathogens have kept pace. To truly understand the global diversity of MDV, future studies will need to include the impacts of recombination and polymorphisms within samples, in addition to the overall consensus-genome differences reflected by static genetic distance analyses.

MDV-1 has proven to be a valuable model for studying virus-host interactions in a natural system. Understanding the genetic variation present in populations of MDV-1 may help us make predictions about the extent of genetic variation in human herpesviruses and lead to the creation of new or improved therapeutics. In combination with statistical models, identification of genetic markers of virulence will aid in tracking the spread of MDV-1 in and between different farms. Epidemiological insights gained from these findings will be of great value in understanding dynamics of disease spread in animal and human populations. Since mutations are the raw material for evolution, understanding the extent and types of viral variations that are present in a field setting will provides valuable insights into the possible future evolution of these pathogens.

## **Acknowledgements**

The authors would also like to thank Michael DeGiorgio, Peter Kerr, Sue Baigent, and members of Szpara and Read labs for helpful feedback and discussion. This work was supported and inspired by the Center for Infectious Disease Dynamics and the Huck Institutes for the Life Sciences at the Pennsylvania State University.

**Table 1: Field sample statistics and assembly of MDV-1 consensus genomes**

| Line # | Category <sup>1</sup>                 | Farm A - dust 1   | Farm A - dust 2   | Farm B - dust     | Farm B - feather 1 | Farm B - feather 2 |
|--------|---------------------------------------|-------------------|-------------------|-------------------|--------------------|--------------------|
| 1      | <b>Nanograms of DNA</b>               | 120               | 127               | 144               | 12                 | 27                 |
| 2      | <b>% MDV-1</b>                        | 2.4%              | 1.3%              | 0.6%              | 40.6%              | 5.7%               |
| 3      | <b>% MDV-2</b>                        | 4.6%              | 2.7%              | 5.9%              | 0.1%               | 0%                 |
| 4      | <b>Total Reads<sup>2</sup></b>        | $1.4 \times 10^7$ | $2.5 \times 10^7$ | $2.7 \times 10^7$ | $3.9 \times 10^5$  | $3.4 \times 10^5$  |
| 5      | <b>MDV-specific reads<sup>2</sup></b> | $3.7 \times 10^5$ | $5.1 \times 10^5$ | $1.4 \times 10^6$ | $1.0 \times 10^5$  | $1.7 \times 10^5$  |
| 6      | <b>% MDV specific reads</b>           | 2.6%              | 2.0%              | 5.2%              | 26.9%              | 48.3%              |
| 7      | <b>Average depth (X-fold)</b>         | 271               | 333               | 597               | 44                 | 68                 |
| 8      | <b>Genome length</b>                  | 177,967           | 178,049           | 178,169           | 178,327            | 178,540            |
| 9      | <b>NCBI accession number</b>          | KU173116          | KU173115          | KU173119          | KU173117           | KU173118           |

<sup>1</sup>Lines 1-3 refer to sample preparation, lines 4-6 to Illumina MiSeq output, and lines 7-9 to new viral genomes.

<sup>2</sup>Sequence read counts in line 4 and 5 are the sum of forward and reverse reads for each sample.

**Table 2. Pair-wise DNA identity and variant proteins between pairs of consensus genomes**

| Comparisons                            | % DNA identity | Total # bp different | Intergenic        |      | Genic             |                 |                                  |
|----------------------------------------|----------------|----------------------|-------------------|------|-------------------|-----------------|----------------------------------|
|                                        |                |                      | INDELs (# events) | SNPs | INDELs (# events) | Synonymous SNPs | Non-synonymous SNPs              |
| Different farms: Dust vs. dust         |                |                      |                   |      |                   |                 |                                  |
| Farm B-dust vs. Farm A-dust 1          | 99.73          | 353                  | 143 (22)          | 140  | 66 (1) in MDV055  | 1 in MDV020     | 3 (one each in MDV010, 012, 056) |
| Farm B-dust vs. Farm A-dust 2          | 99.87          | 195                  | 49 (14)           | 76   | 66 (1) in MDV055  | 1 MDV020        | 3 (one each in MDV010, 012,056)  |
| Same farm: Dust vs. host               |                |                      |                   |      |                   |                 |                                  |
| Farm B-dust vs. Farm B-feather 1       | 99.64          | 552                  | 476 (11)          | 6    | 66 (1) in MDV055  | 1 in MDV020     | 3 (one each in MDV010, 012, 056) |
| Farm B-dust vs. Farm B-feather 2       | 99.52          | 687                  | 572 (19)          | 45   | 66 (1) in MDV055  | 1 in MDV020     | 3 (one each in MDV010, 012, 056) |
| Same farm: Separated in time and space |                |                      |                   |      |                   |                 |                                  |
| Farm A-dust 1 vs. Farm A-dust 2        | 99.76          | 338                  | 170 (20)          | 168  | 0                 | 0               | 0                                |
| Same farm: one host vs. another        |                |                      |                   |      |                   |                 |                                  |
| Farm B-feather 1 vs. Farm B-feather 2  | 99.38          | 973                  | 972 (9)           | 1    | 0                 | 0               | 0                                |

## Supplemental Tables

**Supplemental Table S1: Yield and percent MDV1+MDV2 and total nanograms of DNA in each sample for Farm A-dust 1**

| Samples  | Washes on 0.1 $\mu$ m filter* | %MDV-1      | %MDV-2       | % MDV1 + MDV2 | DNA (ng)    |
|----------|-------------------------------|-------------|--------------|---------------|-------------|
| 1        | 0                             | 2.88        | 5.44         | 8.3           | 6.94        |
| 2        | 0                             | 2.03        | 5.12         | 7.2           | 6.59        |
| 3        | 0                             | 4.16        | 8.39         | 12.5          | 6.73        |
| 4        | 0                             | 2.51        | 4.73         | 7.2           | 4.71        |
| 5        | 0                             | 1.66        | 3.30         | 4.96          | 6.97        |
| <b>6</b> | <b>1</b>                      | <b>9.13</b> | <b>13.99</b> | <b>23.12</b>  | <b>2.69</b> |
| <b>7</b> | <b>1</b>                      | <b>9.29</b> | <b>15.70</b> | <b>24.99</b>  | <b>2.16</b> |
| <b>8</b> | <b>1</b>                      | <b>5.86</b> | <b>10.91</b> | <b>16.77</b>  | <b>3.36</b> |
| 9        | 0                             | 1.89        | 2.98         | 4.9           | 9.81        |
| 10       | 0                             | 1.76        | 2.90         | 4.7           | 17.35       |
| 11       | 0                             | 2.69        | 5.33         | 8.02          | 8.96        |
| 12       | 0                             | 4.49        | 7.80         | 12.29         | 4.14        |
| 13       | 0                             | 1.16        | 2.49         | 3.65          | 20.00       |
| 14       | 0                             | 1.36        | 2.83         | 4.19          | 19.47       |

\*Samples that were washed before lysis (bold) yielded a higher percent MDV DNA, but less DNA overall.



**Supplemental Table S2: Yield and percent MDV1+MDV2 and total nanograms of DNA in each sample for Farm A-dust 2**

| Samples   | Washes on 0.1 $\mu$ M filter* | %MDV-1      | % MDV-2      | %MDV1 + MDV2 | DNA (ng)    |
|-----------|-------------------------------|-------------|--------------|--------------|-------------|
| 1         | 0                             | 1.50        | 3.16         | 4.66         | 10.69       |
| 2         | 0                             | 2.55        | 5.62         | 8.17         | 7.18        |
| 3         | 0                             | 1.36        | 3.68         | 5.04         | 7.62        |
| 4         | 0                             | 1.38        | 2.94         | 4.32         | 9.84        |
| <b>5</b>  | <b>1</b>                      | <b>2.71</b> | <b>6.19</b>  | <b>8.90</b>  | <b>4.11</b> |
| <b>6</b>  | <b>1</b>                      | <b>3.08</b> | <b>5.87</b>  | <b>8.95</b>  | <b>4.37</b> |
| <b>7</b>  | <b>1</b>                      | <b>2.68</b> | <b>4.91</b>  | <b>7.59</b>  | <b>5.88</b> |
| <b>8</b>  | <b>1</b>                      | <b>3.49</b> | <b>6.24</b>  | <b>9.73</b>  | <b>4.88</b> |
| <b>9</b>  | <b>1</b>                      | <b>4.09</b> | <b>7.94</b>  | <b>12.03</b> | <b>2.66</b> |
| <b>10</b> | <b>1</b>                      | <b>6.42</b> | <b>10.52</b> | <b>16.94</b> | <b>3.15</b> |
| 11        | 0                             | 0.26        | 0.91         | 1.17         | 20.35       |
| 12        | 0                             | 0.19        | 0.56         | 0.75         | 26.09       |
| 13        | 0                             | 0.24        | 0.93         | 1.17         | 15.13       |
| 14        | 0                             | 0.36        | 1.21         | 1.57         | 5.62        |

\*Samples that were washed before lysis (bold) yielded a higher percent MDV DNA, but less DNA overall.

**Supplemental Table S3: Yield and percent MDV1+MDV2 and total nanograms of DNA in each sample for Farm B-dust**

| Samples | Washes on 0.1 $\mu$ M filter* | % MDV-1     | % MDV-2      | % MDV-1 +MDV-2 | DNA (ng)    |
|---------|-------------------------------|-------------|--------------|----------------|-------------|
| 1       | 0                             | 0.84        | 6.68         | 7.52           | 14.10       |
| 2       | 0                             | 0.46        | 5.20         | 5.66           | 26.64       |
| 3       | 0                             | 0.65        | 4.85         | 5.50           | 19.43       |
| 4       | 0                             | 0.75        | 5.91         | 6.66           | 16.84       |
| 5       | 0                             | 0.23        | 3.67         | 3.90           | 25.90       |
| 6       | 0                             | 0.53        | 4.65         | 5.18           | 23.50       |
| 7       | <b>1</b>                      | <b>1.10</b> | <b>14.50</b> | <b>15.60</b>   | <b>4.59</b> |
| 8       | <b>1</b>                      | <b>0.95</b> | <b>15.77</b> | <b>16.72</b>   | <b>4.29</b> |
| 9       | <b>1</b>                      | <b>0.95</b> | <b>14.40</b> | <b>15.35</b>   | <b>4.81</b> |
| 10      | <b>1</b>                      | <b>1.02</b> | <b>10.69</b> | <b>11.71</b>   | <b>3.59</b> |

\*Samples that were washed before lysis (bold) yielded a higher percent MDV DNA, but less DNA overall.

**Supplemental Table S4: Yield and percent MDV1+MDV2 and total nanograms of DNA in each sample for Farm B-feathers**

| Samples   | % MDV-1 | % MDV-2 | % MDV-1 +MDV-2 | DNA (ng) |
|-----------|---------|---------|----------------|----------|
| Feather 1 | 40.59   | 0.12    | 40.72          | 11.97    |
| Feather 2 | 5.68    | 0.02    | 5.70           | 27.36    |

# **Supplemental Table S5: Polymorphic loci detected within all consensus genomes using high and low-stringency variant-filtering criteria.**

(see attached Excel spreadsheet)

# **Supplemental Table S6: Chi-squared values from pairwise comparisons of different categories of polymorphisms.**

| Sample*              | Intergenic vs. synonymous      | Intergenic vs. non-synonymous  | Intergenic vs. genic untranslated | Synonymous vs. non-synonymous | Synonymous vs. genic untranslated | Non-synonymous vs. genic untranslated |
|----------------------|--------------------------------|--------------------------------|-----------------------------------|-------------------------------|-----------------------------------|---------------------------------------|
| <b>Farm A-dust 1</b> | $\chi^2=16.6$<br>(p = <0.001)  | $\chi^2=55.47$<br>(p = <0.001) | $\chi^2=3.74$<br>(p = 0.053)      | $\chi^2=0.03$<br>(p=0.873)    | $\chi^2=0.83$<br>(p = 0.361)      | $\chi^2=1.73$<br>(p = 0.189)          |
| <b>Farm A-dust 2</b> | $\chi^2=31.76$<br>(p = <0.001) | $\chi^2=94.93$<br>(p = <0.001) | $\chi^2=9.48$<br>(p = 0.002)      | $\chi^2=1.11$<br>(p = 0.292)  | $\chi^2=2.72$<br>(p = 0.099)      | $\chi^2=0.69$<br>(p = 0.407)          |
| <b>Farm B-dust</b>   | $\chi^2=25.27$<br>(p = <0.001) | $\chi^2=47.32$<br>(p = <0.001) | $\chi^2=5.39$<br>(p = 0.020)      | $\chi^2=1.83$<br>(p = 0.176)  | $\chi^2=1.61$<br>(p = 0.205)      | $\chi^2=0.09$<br>(p = 0.759)          |

\*Degrees of freedom (d.f.) = 1 for all comparisons; p indicates p-value.

# **Supplemental Table S7: Taxonomic diversity present in all five samples.**

(see attached Excel spreadsheet)

## Figures

**Figure 1. Diagram of samples collected for genome sequencing of field isolates of MDV.**

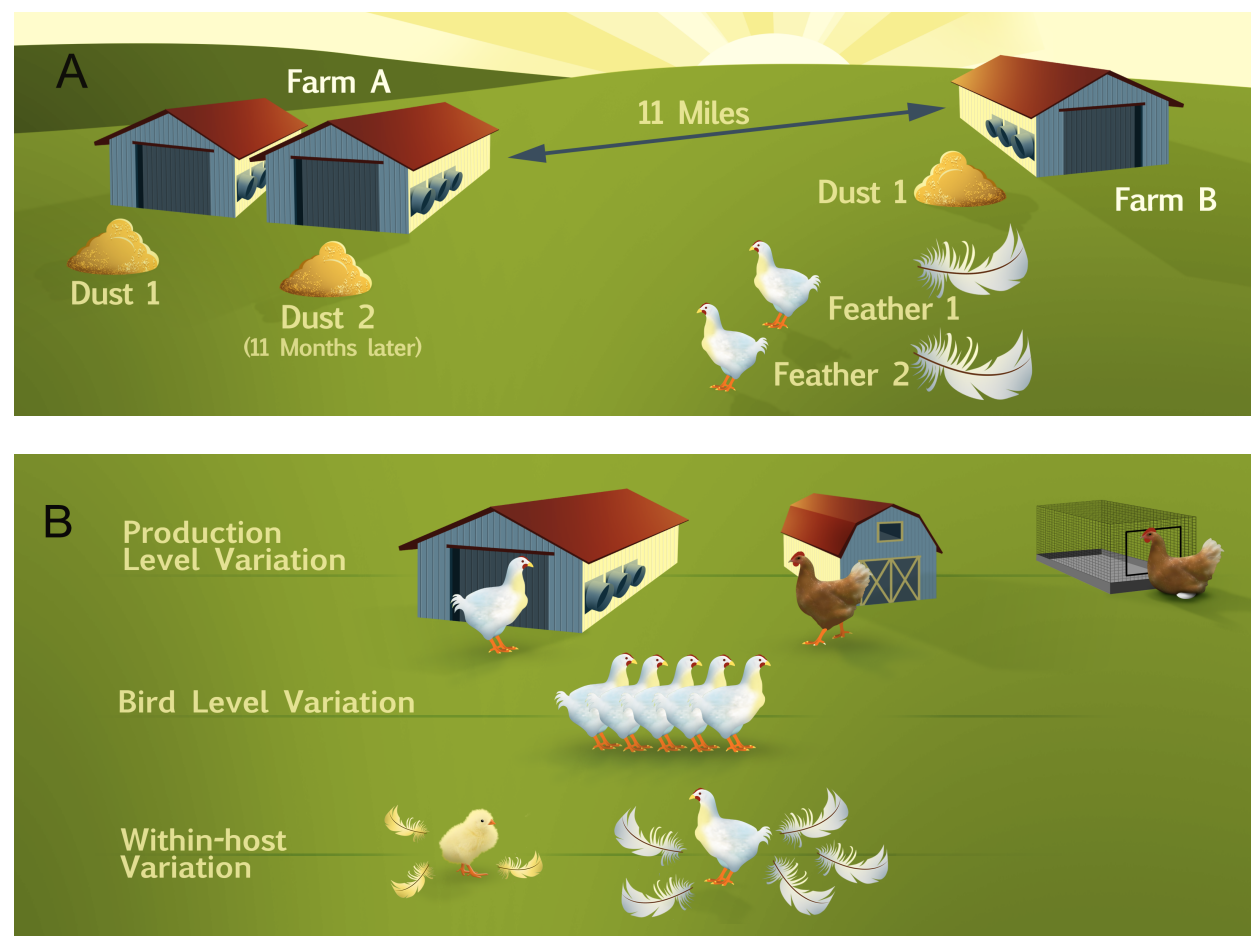

**Figure 1. Diagram of samples collected for genome sequencing of field isolates of MDV.**

(A) Samples collected for genome sequencing were sourced from two Pennsylvania farms with large-scale operations that house approximately 25,000-30,000 individuals per building. These farms were separated by 11 miles. On Farm A, two separate collections of poultry dust were made 11 months apart. On Farm B we collected one dust sample, along with individual feathers from two chickens. In total, three dust collections and two feathers were used to generate five consensus genomes of MDV field isolates (Tables 1-3). (B) Future comparisons using these approaches could include an analysis of viral genome variation between scales or types of production (top row), between different animals within any field site (middle row), or between different body locations or temporal stages of a single host (bottom row). (Artwork by Nick Sloff, Penn State University, Department of Entomology).

**Figure 2. Procedures for enrichment and isolation of MDV DNA from (A) poultry dust or (B) individual feather follicles.**

**A**

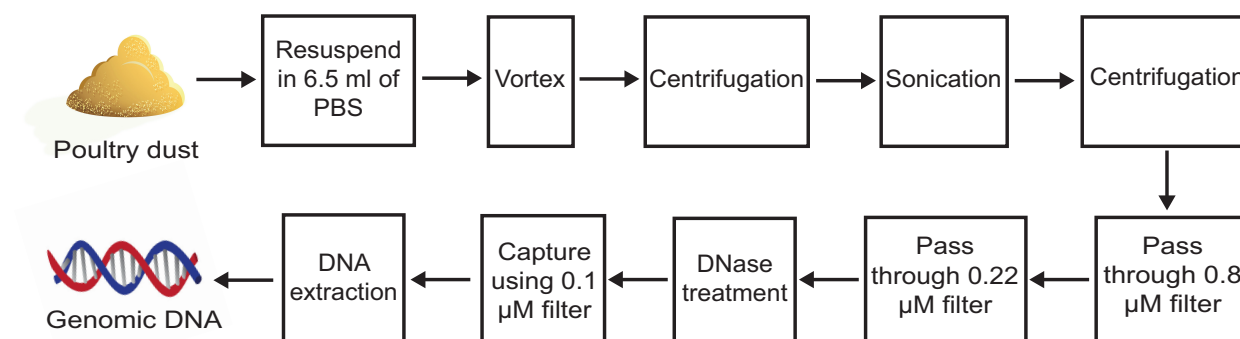

**B**

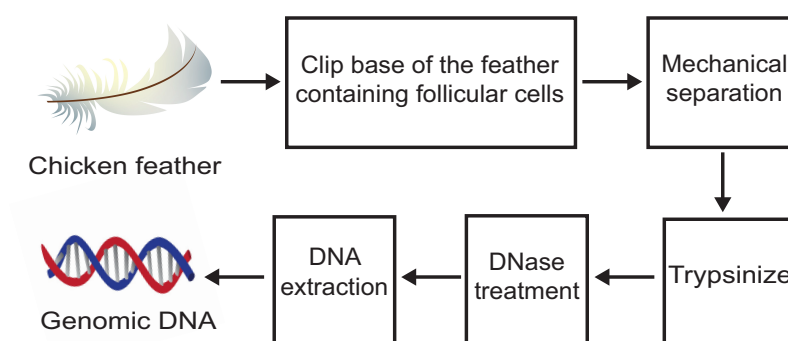

**Figure 2. Procedures for enrichment and isolation of MDV DNA from poultry dust or individual feather follicles. (A)** Procedure for enrichment of MDV DNA using poultry dust as the source of viral DNA. Vortexing, centrifugation and sonication were essential to release cell-associated virus into the solution. The virus-containing supernatant was then passed through 0.8 μM and 0.22 μM filters for removal of larger contaminants. The flow-through was treated with DNase and the viral particles were captured using 0.1 μM filter. The membrane of the 0.1 μM filter was then excised and used for extraction of the viral DNA. **(B)** Procedure for enrichment of MDV DNA using chicken feather follicle as the source of viral DNA. A feather was

mechanically disrupted (bead-beating) and treated with trypsin to break open host cells and release cell-free virus into the solution. The sample was then treated with DNase to remove contaminant DNA. Finally, the viral capsids were lysed to obtain viral genomic DNA.

**Figure 3. Complete and trimmed MDV-1 genome**

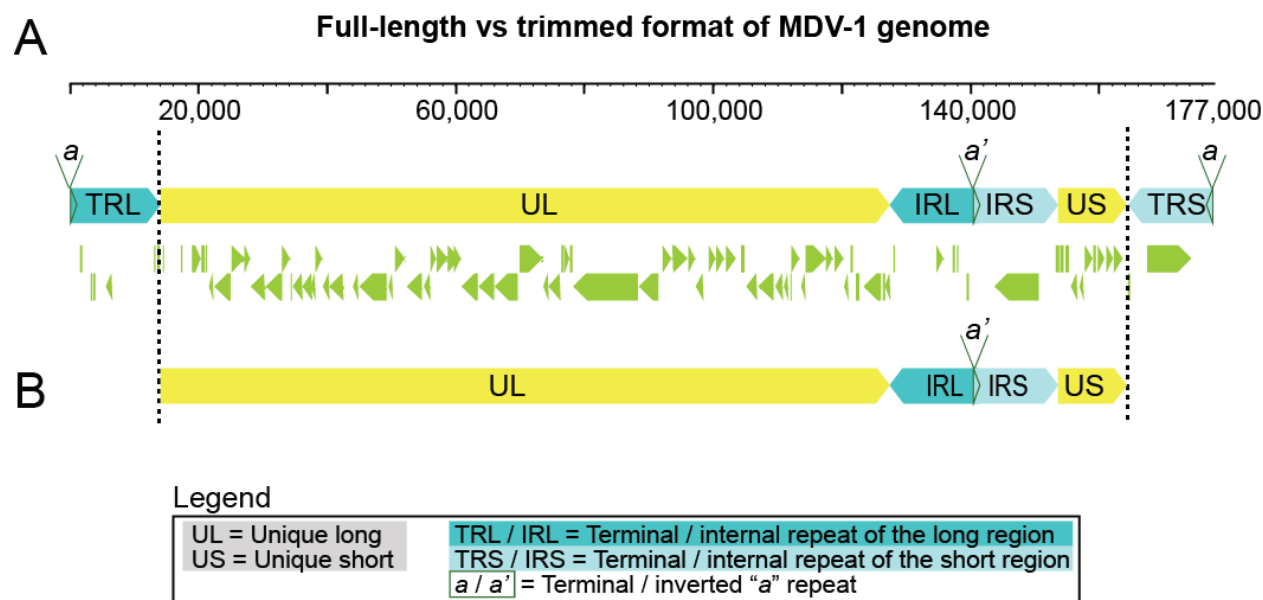

**Figure 3. The complete MDV-1 genome includes two unique regions and two sets of large inverted repeats. (A)** The full structure of the MDV-1 genome includes a unique long region (UL) and a unique short regions (US), each of which are flanked large repeats known as the terminal and internal repeats of the long region (TRL and IRL) and the short region (TRS and IRS). Most of the ORFs (green arrows) lie in the unique regions of the genome. **(B)** A trimmed genome format without the terminal repeat regions was used for analyses in order to not over-represent the repeat regions.

**Figure 4: Genome-wide distribution of polymorphic bases within each consensus genome**

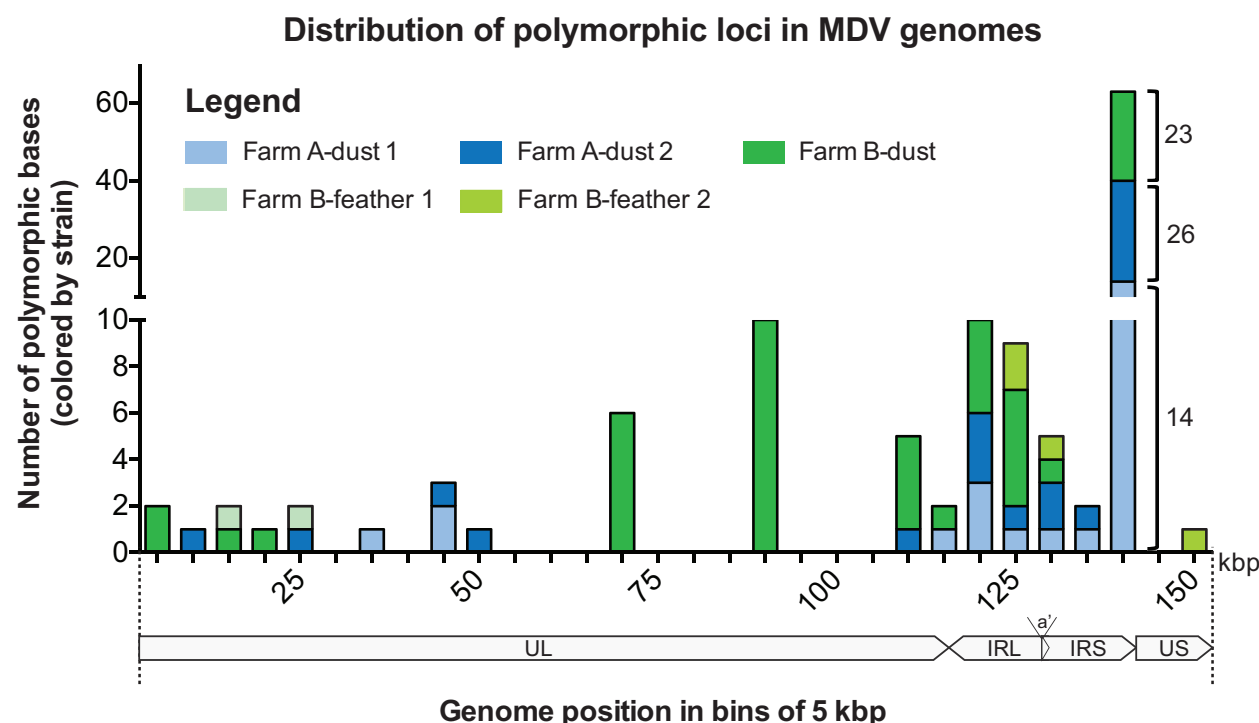

**Figure 4: Genome-wide distribution of polymorphic bases within each consensus genome.**

Polymorphic base calls from each MDV genome were grouped in bins of 5 kb and the sum of polymorphisms in each bin was plotted. Farm B-dust (dark green bars) contained the largest number of polymorphic bases, with the majority occurring in the repeat region (IRL/IRS). Farm A-dust 1 (light blue) and Farm A-dust 2 (dark blue) harbored fewer polymorphic bases, with similar distribution to Farm B-dust. Polymorphic bases detected in feather genomes were more rare, although this likely reflects their lower coverage depth (see **Table 1**). Note that the upper and lower segments of the y-axis have different scales; the number of polymorphic bases per genome for the split column on the right are labeled for clarity.



**Figure 5. Observed vs. expected polymorphism categories for each consensus genome**

**Number of observed vs. expected polymorphisms in each genome**

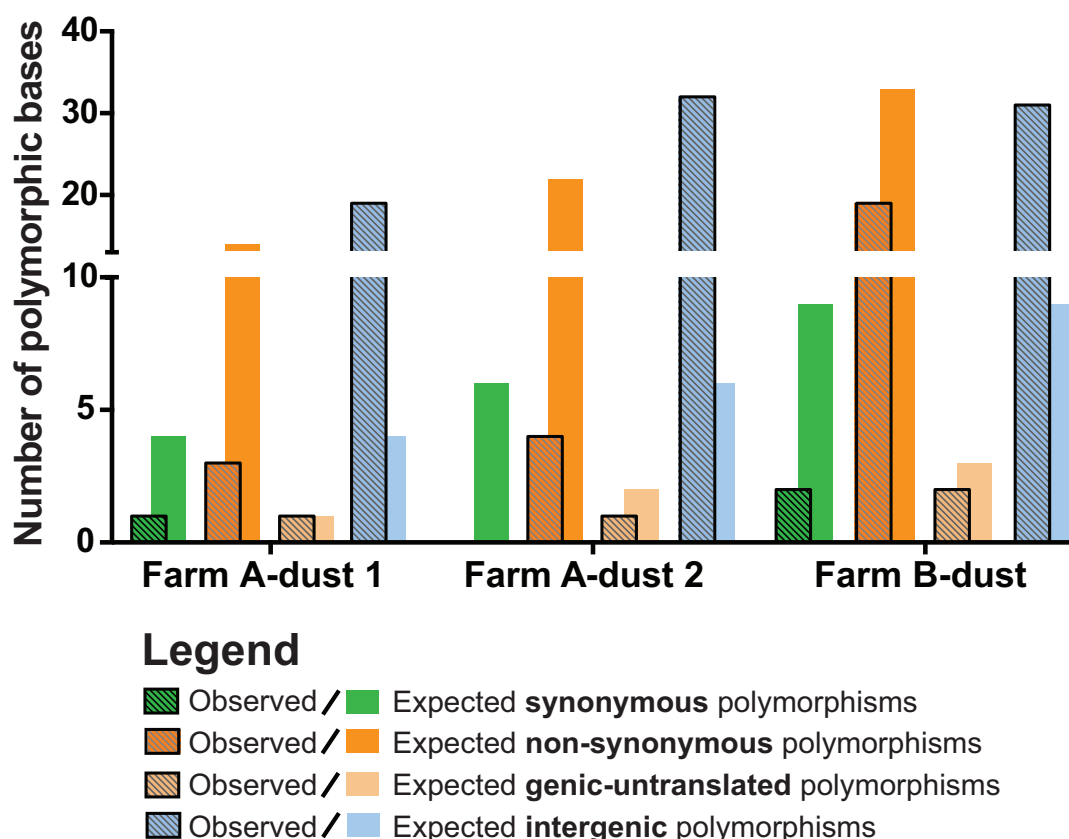

**Figure 5. Observed vs. expected polymorphism categories for each consensus genome.** Each consensus genome was analyzed for the presence of polymorphic loci (see Methods for details). Observed polymorphic loci (striped bars) were categorized as causing synonymous (green), or non-synonymous (dark orange) mutations, or as genic-untranslated (light orange), or intergenic (blue). The expected outcomes (open colored bars) for a random distribution of polymorphisms is plotted behind the observed outcomes (striped bars) for each category. For all genomes there was a significant difference of the observed-vs.-expected intergenic polymorphisms, relative to those of other categories.

**Figure 6: A new polymorphic locus in ICP4, and its shifting allele frequency over time**

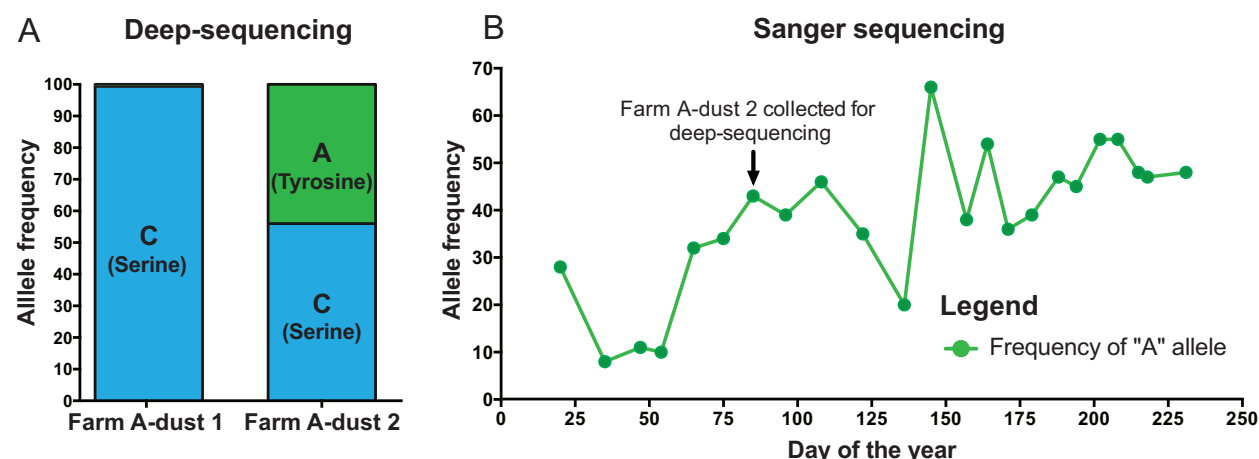

**Figure 6: A new polymorphic locus in ICP4, and its shifting allele frequency over time. (A)** NGS data revealed a new polymorphic locus in ICP4 (MDV084) at nucleotide position 5,495. In the spatially- and temporally-separated dust samples from Farm A (see **Figure 1A** and **Methods** for details), we observed a different prevalence of C (encoding serine) and A (encoding tyrosine) alleles. **(B)** Using targeted Sanger sequencing of this locus, time-separated dust samples spanning nine months were Sanger-sequenced to track polymorphism frequency at this locus over time. The major and minor allele frequencies at this locus varied widely across time, and the major allele switched from C to A more than twice during this time.

**Figure 7: Dendrogram of genetic distances among all sequenced MDV-1 genomes**

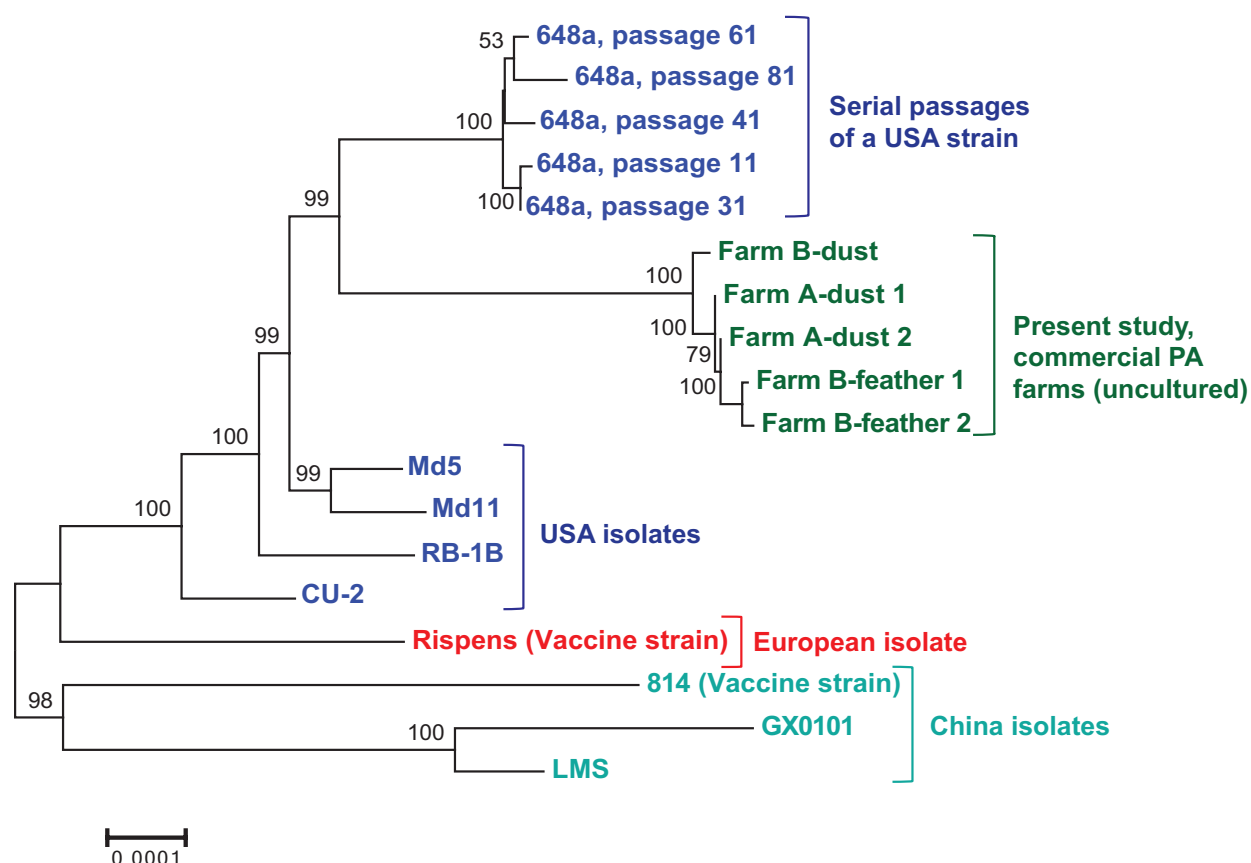

**Figure 7: Dendrogram of genetic distances among all sequenced MDV-1 genomes.** Using a multiple-genome alignment of all available complete MDV-1 genomes, we calculated the evolutionary distances between genomes using the Jukes-Cantor model. A dendrogram was then created using the neighbor-joining method in MEGA with 1000 bootstraps. The five new field-sampled MDV-1 genomes (green) formed a separate group between the two clusters of USA isolates (blue). The European vaccine strain (Rispens) formed a separate clade, as did the three Chinese MDV-1 genomes (aqua). GenBank Accessions for all strains: new genomes, Table 1; Passage 11-648a, JQ806361; Passage 31-648a, JQ806362; Passage 61-648a, JQ809692; Passage 41-648a, JQ809691; Passage 81-648a, JQ820250; CU-2, EU499381; RB-1B, EF523390; Md11, 170950; Md5, AF243438; Rispens (CVI988), DQ530348; 814, JF742597; GX0101, JX844666; LMS, JQ314003.

# Supplemental Figures

## Supplemental Figure S1. Workflow for computational enrichment for MDV sequences and subsequent viral genome assembly and taxonomic profiling

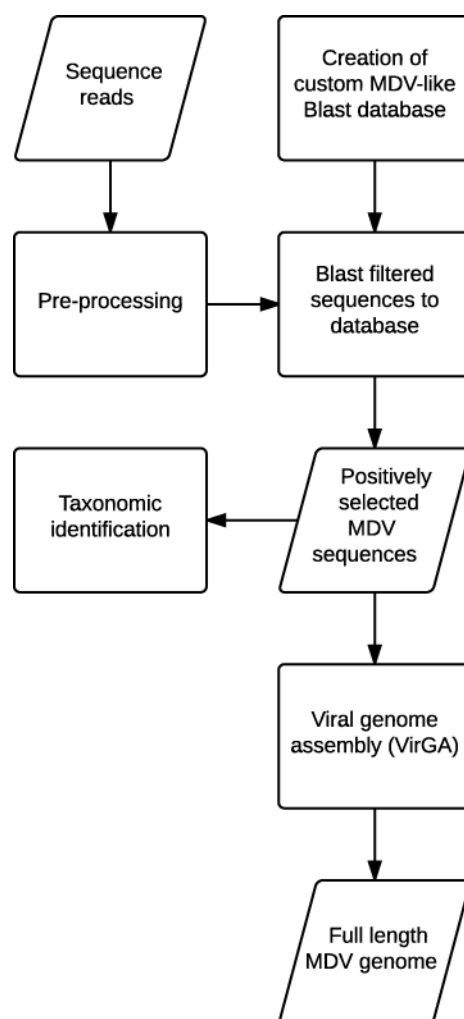

**Supplemental Figure S1. Workflow for computational enrichment for MDV sequences and subsequent viral genome assembly and taxonomic profiling.** The VirGA workflow (44) requires an input of high-quality NGS data from the viral genome of interest. For this study we added an additional step that selected MDV-like sequence reads from the milieu of dust and feather samples. The sequence reads of interest were obtained by using BLAST to compare all reads against a custom MDV database with an E-value of  $10^{-2}$ ; these were then submitted to VirGA for assembly. Taxonomic profiling followed a similar path using NCBI's all-nucleotide database to identify the taxonomic kingdom for each sequence read. In this workflow diagram, parallelograms represent data outputs while rectangles represent computational actions.

# **Supplemental Figure S2. Genome-wide distribution of polymorphisms within each consensus genome, using high-stringency criteria**

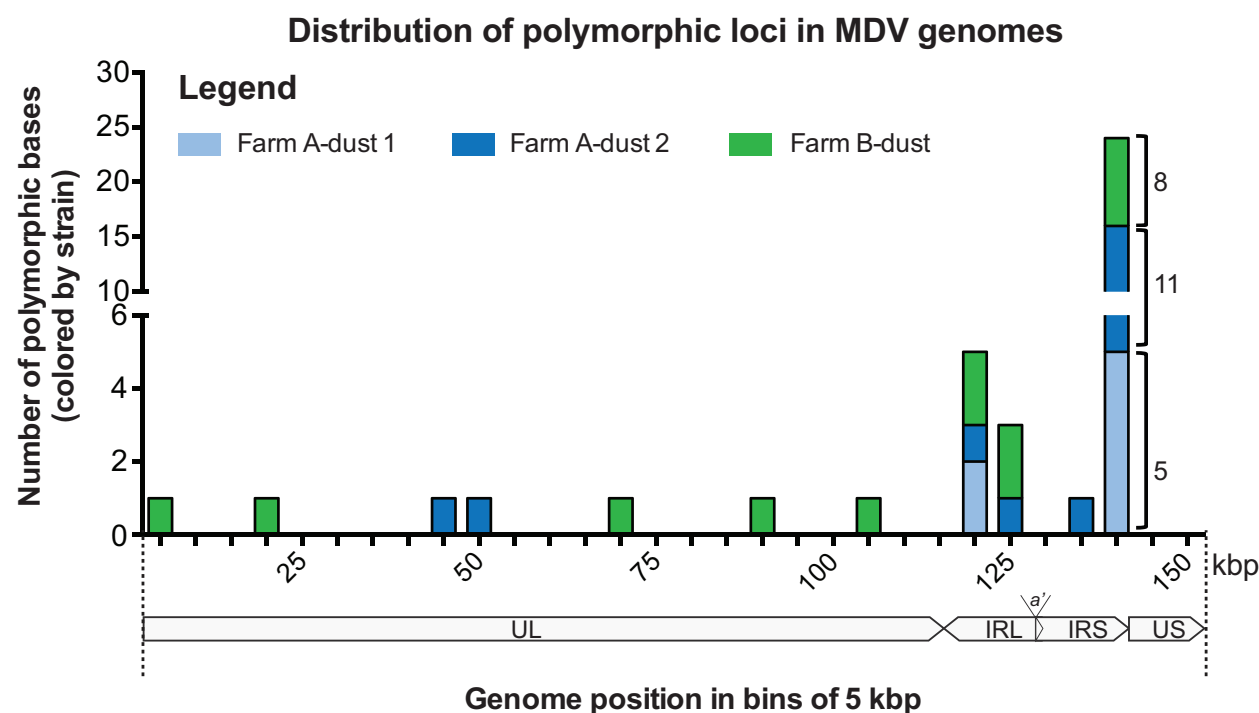

**Supplemental Figure S2: Genome-wide distribution of polymorphisms within each consensus genome, using high-stringency criteria.** Polymorphic base calls from each MDV genome were grouped by position in bins of 5 kb and the sum of polymorphisms in each bin was plotted. Stricter parameters of polymorphism detection (see **Methods** for details) revealed a similar distribution to those in **Figure 4**. No polymorphisms were detected in feather-derived genomes using high-stringency criteria, due to their lower coverage depth (see **Table 1**). Note that the upper and lower segments of the y-axis have different scales; the number of polymorphic bases per segment for the split column on the right are thus labeled on the graph.

# Supplemental Figure S3. Taxonomic diversity in poultry dust and chicken feathers from

## Farm B

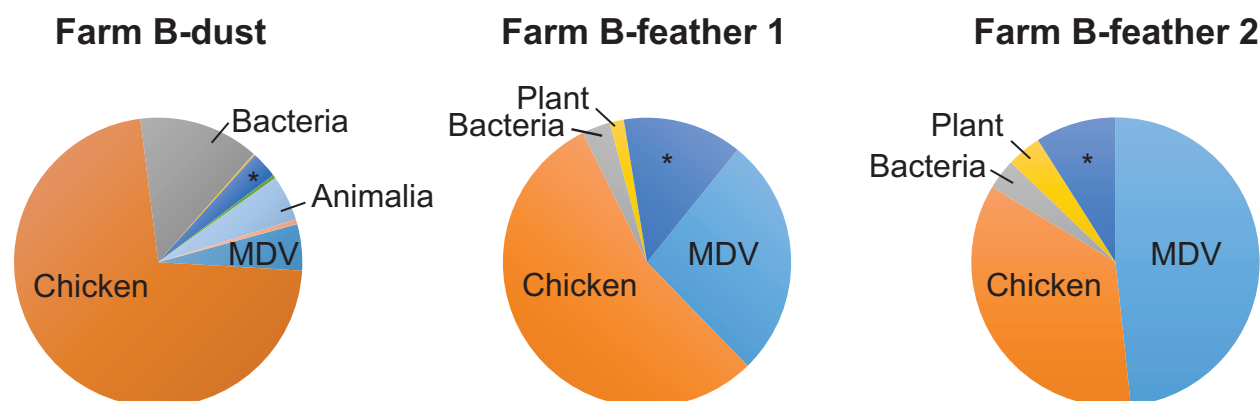

\*Unclassified or low prevalence

# Supplemental Figure S3. Taxonomic diversity in poultry dust and chicken feathers from

**Farm B.** We used an iterative BLASTN workflow to generate taxonomic profiles for all samples from Farm B (see **Methods** for details). Major categories are shown here, with a full list of taxa (to family level) in **Supplemental Table S7**. Farm B-feather 1 and Farm B-feather 2 show less overall diversity, as would be expected from direct host-sampling, vs. the environmental mixture of the dust samples. Since the viral DNA enrichment procedures remove variable amounts of host and environmental contaminants, the proportion of taxa present is representative but not fully descriptive of those present initially.

## References

1. **Biggs PM.** 2004. Marek's disease: Long and difficult beginnings, p. 8–16. *In* Davison, F, Nair, V (eds.), Marek's Disease. Academic Press, Oxford.
2. **Baigent SJ, Davison F.** 2004. 6 - Marek's disease virus: Biology and life cycle, p. 62–ii. *In* Davison, F, Nair, V (eds.), Marek's Disease. Academic Press, Oxford.
3. **Gimeno IM.** 2008. Marek's disease vaccines: a solution for today but a worry for tomorrow? *Vaccine* **26 Suppl 3**:C31–41.
4. **Spatz SJ, Schat KA.** 2011. Comparative genomic sequence analysis of the Marek's disease vaccine strain SB-1. *Virus Genes* **42**:331–338.
5. **Atkins KE, Read AF, Walkden-Brown SW, Savill NJ, Woolhouse MEJ.** 2013. The effectiveness of mass vaccination on Marek's disease virus (MDV) outbreaks and detection within a broiler barn: a modeling study. *Epidemics* **5**:208–217.
6. **Beasley JN, Patterson LT, McWade DH.** 1970. Transmission of Marek's disease by poultry house dust and chicken dander. *Am J Vet Res* **31**:339–344.
7. **Couteaudier M, Denesvre C.** 2014. Marek's disease virus and skin interactions. *Vet Res* **45**:36.
8. **Witter RL, Lee LF.** 1984. Polyvalent Marek's disease vaccines: Safety, efficacy and protective synergism in chickens with maternal antibodies. *Avian Pathol* **13**:75–92.
9. **Atkins KE, Read AF, Savill NJ, Renz KG, Islam AFMF, Walkden-Brown SW, Woolhouse MEJ.** 2013. Vaccination and reduced cohort duration can drive virulence evolution: Marek's disease virus and industrialized agriculture. *Evol Int J Org Evol* **67**:851–860.
10. **Read AF, Baigent SJ, Powers C, Kgosana LB, Blackwell L, Smith LP, Kennedy DA, Walkden-Brown SW, Nair VK.** 2015. Imperfect Vaccination Can Enhance the Transmission of Highly Virulent Pathogens. *PLoS Biol* **13**.
11. **Witter RL.** 1997. Increased virulence of Marek's disease virus field isolates. *Avian Dis* **41**:149–163.
12. **Nair V.** 2013. Latency and Tumorigenesis in Marek's Disease. *Avian Dis* **57**:360–365.
13. **Tulman ER, Afonso CL, Lu Z, Zsak L, Rock DL, Kutish GF.** 2000. The Genome of a Very Virulent Marek's Disease Virus. *J Virol* **74**:7980–7988.
14. **Niikura M, Dodgson J, Cheng H.** 2006. Direct evidence of host genome acquisition by the alphaherpesvirus Marek's disease virus. *Arch Virol* **151**:537–549.

15. **Spatz SJ, Silva RF.** 2007. Sequence determination of variable regions within the genomes of gallid herpesvirus-2 pathotypes. *Arch Virol* **152**:1665–1678.
16. **Spatz SJ, Zhao Y, Petherbridge L, Smith LP, Baigent SJ, Nair V.** 2007. Comparative sequence analysis of a highly oncogenic but horizontal spread-defective clone of Marek's disease virus. *Virus Genes* **35**:753–766.
17. **Zhang F, Liu C-J, Zhang Y-P, Li Z-J, Liu A-L, Yan F-H, Cong F, Cheng Y.** 2011. Comparative full-length sequence analysis of Marek's disease virus vaccine strain 814. *Arch Virol* **157**:177–183.
18. **Cheng Y, Cong F, Zhang Y, Li Z, Xu N, Hou G, Liu C.** 2012. Genome sequence determination and analysis of a Chinese virulent strain, LMS, of Gallid herpesvirus type 2. *Virus Genes* **45**:56–62.
19. **Spatz SJ, Volkening JD, Gimeno IM, Heidari M, Witter RL.** 2012. Dynamic equilibrium of Marek's disease genomes during in vitro serial passage. *Virus Genes* **45**:526–536.
20. **Su S, Cui N, Cui Z, Zhao P, Li Y, Ding J, Dong X.** 2012. Complete Genome Sequence of a Recombinant Marek's Disease Virus Field Strain with One Reticuloendotheliosis Virus Long Terminal Repeat Insert. *J Virol* **86**:13818–13819.
21. **Peters G a, Tyler SD, Grose C, Severini A, Gray MJ, Upton C, Tipples G a.** 2006. A full-genome phylogenetic analysis of varicella-zoster virus reveals a novel origin of replication-based genotyping scheme and evidence of recombination between major circulating clades. *J Virol* **80**:9850–9860.
22. **Tyler SD, Peters GA, Grose C, Severini A, Gray MJ, Upton C, Tipples GA.** 2007. Genomic cartography of varicella-zoster virus: a complete genome-based analysis of strain variability with implications for attenuation and phenotypic differences. *Virology* **359**:447–58.
23. **Bradley AJ, Lurain NS, Ghazal P, Trivedi U, Cunningham C, Baluchova K, Gatherer D, Wilkinson GWG, Dargan DJ, Davison AJ.** 2009. High-throughput sequence analysis of variants of human cytomegalovirus strains Towne and AD169. *J Gen Virol* **90**:2375–80.
24. **Dargan DJ, Douglas E, Cunningham C, Jamieson F, Stanton RJ, Baluchova K, McSharry BP, Tomasec P, Emery VC, Percivalle E, Sarasini A, Gerna G, Wilkinson GWG, Davison AJ.** 2010. Sequential mutations associated with adaptation of human cytomegalovirus to growth in cell culture. *J Gen Virol* **91**:1535–46.
25. **Szpara ML, Tafuri YR, Parsons L, Shamim SR, Verstrepen KJ, Legendre M, Enquist LW.** 2011. A wide extent of inter-strain diversity in virulent and vaccine strains of alphaherpesviruses. *PLoS Pathog* **7**:1–23.



26. **Szpara ML, Gatherer D, Ochoa A, Greenbaum B, Dolan A, Bowden RJ, Enquist LW, Legendre M, Davison AJ.** 2014. Evolution and diversity in human herpes simplex virus genomes. *J Virol* **88**:1209–27.
27. **Newman RM, Lamers SL, Weiner B, Ray SC, Colgrove RC, Diaz F, Jing L, Wang K, Saif S, Young S, Henn M, Laeyendecker O, Tobian AAR, Cohen JI, Koelle DM, Quinn TC, Knipe DM.** 2015. Genome Sequencing and Analysis of Geographically Diverse Clinical Isolates of Herpes Simplex Virus 2. *J Virol* **JVI.01303–15**.
28. **Spatz SJ.** 2010. Accumulation of attenuating mutations in varying proportions within a high passage very virulent plus strain of Gallid herpesvirus type 2. *Virus Res* **149**:135–142.
29. **Hildebrandt E, Dunn JR, Perumbakkam S, Niikura M, Cheng HH.** 2014. Characterizing the molecular basis of attenuation of Marek's disease virus via in vitro serial passage identifies de novo mutations in the helicase-primase subunit gene UL5 and other candidates associated with reduced virulence. *J Virol* **88**:6232–6242.
30. **Dix RD, McKendall RR, Baringer JR.** 1983. Comparative neurovirulence of herpes simplex virus type 1 strains after peripheral or intracerebral inoculation of BALB/c mice. *Infect Immun* **40**:103–112.
31. **Cunningham C, Gatherer D, Hilfrich B, Baluchova K, Derrick J, Thomson M, Griffiths PD, Wilkinson GWG, Schulz TF, Dargan DJ, Davison AJ.** 2010. Sequences of complete human cytomegalovirus genomes from infected cell cultures and clinical specimens. *J Gen Virol* **91**:605–15.
32. **Depledge DP, Palser AL, Watson SJ, Lai IY-C, Gray ER, Grant P, Kanda RK, Leproust E, Kellam P, Breuer J.** 2011. Specific capture and whole-genome sequencing of viruses from clinical samples. *PloS One* **6**:1–7.
33. **Renzette N, Bhattacharjee B, Jensen JD, Gibson L, Kowalik TF.** 2011. Extensive genome-wide variability of human cytomegalovirus in congenitally infected infants. *PLoS Pathog* **7**:e1001344.
34. **Renzette N, Gibson L, Bhattacharjee B, Fisher D, Schleiss MR, Jensen JD, Kowalik TF.** 2013. Rapid intrahost evolution of human cytomegalovirus is shaped by demography and positive selection. *PLoS Genet* **9**:e1003735.
35. **Lei H, Li T, Hung G-C, Li B, Tsai S, Lo S-C.** 2013. Identification and characterization of EBV genomes in spontaneously immortalized human peripheral blood B lymphocytes by NGS technology. *BMC Genomics* **14**:804.
36. **Renzette N, Pokalyuk C, Gibson L, Bhattacharjee B, Schleiss MR, Hamprecht K, Yamamoto AY, Mussi-Pinhata MM, Britt WJ, Jensen JD, Kowalik TF.** 2015. Limits and patterns of cytomegalovirus genomic diversity in humans. *Proc Natl Acad Sci* **201501880**.

37. **Renzette N, Gibson L, Jensen JD, Kowalik TF.** 2014. Human cytomegalovirus intrahost evolution—a new avenue for understanding and controlling herpesvirus infections. *Curr Opin Virol* **8**:109–115.
38. **Sijmons S, Van Ranst M, Maes P.** 2014. Genomic and Functional Characteristics of Human Cytomegalovirus Revealed by Next-Generation Sequencing. *Viruses* **6**:1049–1072.
39. **Holland J, Spindler K, Horodyski F, Grabau E, Nichol S, VandePol S.** 1982. Rapid evolution of RNA genomes. *Science* **215**:1577–1585.
40. **Domingo E, Martín V, Perales C, Grande-Pérez A, García-Arriaza J, Arias A.** 2006. Viruses as Quasispecies: Biological Implications, p. 51–82. *In* Domingo, E (ed.), *Quasispecies: Concept and Implications for Virology*. Springer Berlin Heidelberg.
41. **Depledge DP, Kundu S, Jensen NJ, Gray ER, Jones M, Steinberg S, Gershon A, Kinchington PR, Schmid DS, Balloux F, Nichols RA, Breuer J.** 2014. Deep Sequencing of Viral Genomes Provides Insight into the Evolution and Pathogenesis of Varicella Zoster Virus and Its Vaccine in Humans. *Mol Biol Evol* **31**:397–409.
42. **Islam A, Harrison B, Cheetham BF, Mahony TJ, Young PL, Walkden-Brown SW.** 2004. Differential amplification and quantitation of Marek’s disease viruses using real-time polymerase chain reaction. *J Virol Methods* **119**:103–113.
43. **Altschul SF, Gish W, Miller W, Myers EW, Lipman DJ.** 1990. Basic local alignment search tool. *J Mol Biol* **215**:403–410.
44. **Parsons LR, Tafuri YR, Shreve JT, Bowen CD, Shipley MM, Enquist LW, Szpara ML.** 2015. Rapid genome assembly and comparison decode intrastrain variation in human alphaherpesviruses. *mBio* **6**.
45. **Kuhn JH, Bao Y, Bavari S, Becker S, Bradfute S, Brister JR, Bukreyev AA, Chandran K, Davey RA, Dolnik O, Dye JM, Enterlein S, Hensley LE, Honko AN, Jahrling PB, Johnson KM, Kobinger G, Leroy EM, Lever MS, Mühlberger E, Netesov SV, Olinger GG, Palacios G, Patterson JL, Paweska JT, Pitt L, Radoshitzky SR, Saphire EO, Smither SJ, Swanepoel R, Towner JS, van der Groen G, Volchkov VE, Wahl-Jensen V, Warren TK, Weidmann M, Nichol ST.** 2013. Virus nomenclature below the species level: a standardized nomenclature for natural variants of viruses assigned to the family Filoviridae. *Arch Virol* **158**:301–311.
46. **Szpara ML, Parsons L, Enquist LW.** 2010. Sequence variability in clinical and laboratory isolates of herpes simplex virus 1 reveals new mutations. *J Virol* **84**:5303–13.
47. **Watson G, Xu W, Reed A, Babra B, Putman T, Wick E, Wechsler SL, Rohrmann GF, Jin L.** 2012. Sequence and comparative analysis of the genome of HSV-1 strain McKrae. *Virology* **433**:528–37.

48. **Koboldt DC, Zhang Q, Larson DE, Shen D, McLellan MD, Lin L, Miller CA, Mardis ER, Ding L, Wilson RK.** 2012. VarScan 2: Somatic mutation and copy number alteration discovery in cancer by exome sequencing. *Genome Res* **22**:568–576.
49. **Nakamura K, Oshima T, Morimoto T, Ikeda S, Yoshikawa H, Shiwa Y, Ishikawa S, Linak MC, Hirai A, Takahashi H, Altaf-Ul-Amin M, Ogasawara N, Kanaya S.** 2011. Sequence-specific error profile of Illumina sequencers. *Nucleic Acids Res* **39**:1–13.
50. **Cingolani P, Platts A, Wang LL, Coon M, Nguyen T, Wang L, Land SJ, Lu X, Ruden DM.** 2012. A program for annotating and predicting the effects of single nucleotide polymorphisms, SnpEff. *Fly (Austin)* **6**:80–92.
51. **Cingolani P, Patel VM, Coon M, Nguyen T, Land SJ, Ruden DM, Lu X.** 2012. Using *Drosophila melanogaster* as a Model for Genotoxic Chemical Mutational Studies with a New Program, SnpSift. *Front Genet* **3**.
52. **Roy S, Schreiber E.** 2014. Detecting and Quantifying Low Level Gene Variants in Sanger Sequencing Traces Using the ab1 Peak Reporter Tool. *J Biomol Tech JBT* **25**:S13–S14.
53. **Spatz SJ, Rue CA.** 2008. Sequence determination of a mildly virulent strain (CU-2) of Gallid herpesvirus type 2 using 454 pyrosequencing. *Virus Genes* **36**:479–489.
54. **Niikura M, Dodgson J, Cheng H.** 2005. Direct evidence of host genome acquisition by the alphaherpesvirus Marek's disease virus. *Arch Virol* **151**:537–549.
55. **Spatz SJ, Petherbridge L, Zhao Y, Nair V.** 2007. Comparative full-length sequence analysis of oncogenic and vaccine (Rispen) strains of Marek's disease virus. *J Gen Virol* **88**:1080–1096.
56. **Katoh K, Misawa K, Kuma K, Miyata T.** 2002. MAFFT: a novel method for rapid multiple sequence alignment based on fast Fourier transform. *Nucleic Acids Res* **30**:3059–3066.
57. **JUKES TH, CANTOR CR.** 1969. CHAPTER 24 - Evolution of Protein Molecules, p. 21–132. *In* MUNRO, HN (ed.), *Mammalian Protein Metabolism*. Academic Press.
58. **Saitou N, Nei M.** 1987. The neighbor-joining method: a new method for reconstructing phylogenetic trees. *Mol Biol Evol* **4**:406–425.
59. **Tamura K, Stecher G, Peterson D, Filipski A, Kumar S.** 2013. MEGA6: Molecular Evolutionary Genetics Analysis Version 6.0. *Mol Biol Evol* **30**:2725–2729.
60. **Felsenstein J.** 1985. Confidence Limits on Phylogenies: An Approach Using the Bootstrap. *Evolution* **39**:783–791.
61. 2013. *Fields virology* 6th ed. Wolters Kluwer/Lippincott Williams & Wilkins Health, Philadelphia, PA.

62. **Pellett PE, Roizman B.** 2013. Herpesviridae, p. 1802–1822. *In* Fields Virology, 6th ed. Lippincott Williams & Wilkins, Philadelphia, PA.
63. **Knipe DM, Howley P.** 2013. Fields Virology. Lippincott Williams & Wilkins.
64. **Osterrieder K, Vautherot J-F.** 2004. 3 - The genome content of Marek's disease-like viruses, p. 17–31. *In* Davison, F, Nair, V (eds.), Marek's Disease. Academic Press, Oxford.
65. **Xie Q, Anderson AS, Morgan RW.** 1996. Marek's disease virus (MDV) ICP4, pp38, and meq genes are involved in the maintenance of transformation of MDCC-MSB1 MDV-transformed lymphoblastoid cells. *J Virol* **70**:1125–1131.
66. **Norberg P, Tyler S, Severini A, Whitley R, Liljeqvist J-A, Bergstrom T.** 2011. A genome-wide comparative evolutionary analysis of herpes simplex virus type 1 and varicella zoster virus. *PloS One* **6**:1–8.
67. **Grose C.** 2012. Pangaea and the Out-of-Africa Model of Varicella-Zoster Virus Evolution and Phylogeography. *J Virol* **86**:9558–9565.
68. **Kolb AW, Ané C, Brandt CR.** 2013. Using HSV-1 genome phylogenetics to track past human migrations. *PloS One* **8**:1–9.
69. **Chow VT, Tipples GA, Grose C.** 2013. Bioinformatics of varicella-zoster virus: single nucleotide polymorphisms define clades and attenuated vaccine genotypes. *Infect Genet Evol J Mol Epidemiol Evol Genet Infect Dis* **18**:351–356.
70. **Renzette N, Bhattacharjee B, Jensen JD, Gibson L, Kowalik TF.** 2011. Extensive genome-wide variability of human cytomegalovirus in congenitally infected infants. *PLoS Pathog* **7**:1–14.

**Farm A/dust 1 (low stringency)**

| Isolate       | Position in the genome | Major allele | Minor allele | Minor allele frequency | Reads supporting major allele on forward strand | Reads supporting major allele on reverse strand | Reads supporting minor allele on forward strand | Reads supporting minor allele on reverse strand | Percent reads supporting minor allele on forward strand | Percent reads supporting minor allele on reverse strand | Type of variation      | Gene   |
|---------------|------------------------|--------------|--------------|------------------------|-------------------------------------------------|-------------------------------------------------|-------------------------------------------------|-------------------------------------------------|---------------------------------------------------------|---------------------------------------------------------|------------------------|--------|
| Farm A/dust 1 | 30905                  | G            | A            | 7.61%                  | 53                                              | 32                                              | 2                                               | 5                                               | 29%                                                     | 71%                                                     | Synonymous variant     | MDV030 |
| Farm A/dust 1 | 40519                  | G            | A            | 17.78%                 | 56                                              | 18                                              | 12                                              | 4                                               | 75%                                                     | 25%                                                     | Non-synonymous variant | MDV034 |
| Farm A/dust 1 | 43053                  | G            | A            | 17.24%                 | 48                                              | 24                                              | 12                                              | 3                                               | 80%                                                     | 20%                                                     | Genic_UTR              | MDV035 |
| Farm A/dust 1 | 113439                 | G            | T            | 7.61%                  | 66                                              | 19                                              | 6                                               | 1                                               | 86%                                                     | 14%                                                     | Non-synonymous variant | MDV073 |
| Farm A/dust 1 | 115376                 | C            | A            | 8.16%                  | 93                                              | 42                                              | 6                                               | 6                                               | 50%                                                     | 50%                                                     | Intergenic             | N/A    |
| Farm A/dust 1 | 115377                 | C            | A            | 29.20%                 | 51                                              | 29                                              | 21                                              | 12                                              | 64%                                                     | 36%                                                     | Intergenic             | N/A    |
| Farm A/dust 1 | 117527                 | G            | T            | 4.55%                  | 132                                             | 57                                              | 6                                               | 3                                               | 67%                                                     | 33%                                                     | Intergenic             | N/A    |
| Farm A/dust 1 | 121803                 | C            | T            | 26.11%                 | 92                                              | 41                                              | 39                                              | 8                                               | 83%                                                     | 17%                                                     | Genic_UTR              | MDV076 |
| Farm A/dust 1 | 126256                 | T            | G            | 12.96%                 | 43                                              | 4                                               | 4                                               | 3                                               | 57%                                                     | 43%                                                     | Intergenic             | N/A    |
| Farm A/dust 1 | 132086                 | T            | C            | 11.97%                 | 108                                             | 17                                              | 14                                              | 3                                               | 82%                                                     | 18%                                                     | Non-synonymous variant | MDV084 |
| Farm A/dust 1 | 137099                 | A            | C            | 34.74%                 | 42                                              | 20                                              | 18                                              | 15                                              | 55%                                                     | 45%                                                     | Intergenic             | N/A    |
| Farm A/dust 1 | 137100                 | A            | C            | 8.41%                  | 58                                              | 40                                              | 8                                               | 1                                               | 89%                                                     | 11%                                                     | Intergenic             | N/A    |
| Farm A/dust 1 | 137101                 | A            | C            | 5.93%                  | 75                                              | 36                                              | 4                                               | 3                                               | 57%                                                     | 43%                                                     | Intergenic             | N/A    |
| Farm A/dust 1 | 137264                 | A            | G            | 5.22%                  | 87                                              | 40                                              | 5                                               | 2                                               | 71%                                                     | 29%                                                     | Intergenic             | N/A    |
| Farm A/dust 1 | 138209                 | C            | A            | 8.27%                  | 88                                              | 34                                              | 8                                               | 3                                               | 73%                                                     | 27%                                                     | Intergenic             | N/A    |
| Farm A/dust 1 | 138212                 | C            | G            | 6.29%                  | 93                                              | 41                                              | 8                                               | 1                                               | 89%                                                     | 11%                                                     | Intergenic             | N/A    |
| Farm A/dust 1 | 138213                 | T            | A            | 7.87%                  | 77                                              | 40                                              | 9                                               | 1                                               | 90%                                                     | 10%                                                     | Intergenic             | N/A    |
| Farm A/dust 1 | 138281                 | A            | C            | 12.82%                 | 47                                              | 21                                              | 6                                               | 4                                               | 60%                                                     | 40%                                                     | Intergenic             | N/A    |
| Farm A/dust 1 | 138377                 | G            | C            | 8.33%                  | 60                                              | 50                                              | 1                                               | 9                                               | 10%                                                     | 90%                                                     | Intergenic             | N/A    |
| Farm A/dust 1 | 138379                 | A            | C            | 9.71%                  | 39                                              | 54                                              | 1                                               | 9                                               | 10%                                                     | 90%                                                     | Intergenic             | N/A    |
| Farm A/dust 1 | 138381                 | A            | T            | 10.78%                 | 44                                              | 47                                              | 2                                               | 9                                               | 18%                                                     | 82%                                                     | Intergenic             | N/A    |
| Farm A/dust 1 | 138490                 | A            | T            | 12.64%                 | 56                                              | 20                                              | 3                                               | 8                                               | 27%                                                     | 73%                                                     | Intergenic             | N/A    |
| Farm A/dust 1 | 138492                 | C            | T            | 10.84%                 | 52                                              | 22                                              | 2                                               | 7                                               | 22%                                                     | 78%                                                     | Intergenic             | N/A    |
| Farm A/dust 1 | 138523                 | A            | G            | 35.48%                 | 31                                              | 9                                               | 12                                              | 10                                              | 55%                                                     | 45%                                                     | Intergenic             | N/A    |

**Farm A/dust 2 (low stringency)**

| Isolate       | Position in the genome | Major allele | Minor allele | Minor allele frequency | Reads supporting major allele on forward strand | Reads supporting major allele on reverse strand | Reads supporting minor allele on forward strand | Reads supporting minor allele on reverse strand | Percent reads supporting minor allele on forward strand | Percent reads supporting minor allele on reverse strand | Type of variation      | Gene   |
|---------------|------------------------|--------------|--------------|------------------------|-------------------------------------------------|-------------------------------------------------|-------------------------------------------------|-------------------------------------------------|---------------------------------------------------------|---------------------------------------------------------|------------------------|--------|
| Farm A/dust 2 | 7251                   | G            | A            | 5.14%                  | 63                                              | 103                                             | 1                                               | 8                                               | 11%                                                     | 88.89%                                                  | Intergenic             | N/A    |
| Farm A/dust 2 | 22829                  | A            | G            | 4.35%                  | 105                                             | 71                                              | 6                                               | 2                                               | 75%                                                     | 25.00%                                                  | Non-synonymous variant | MDV025 |
| Farm A/dust 2 | 40519                  | G            | A            | 19.75%                 | 51                                              | 79                                              | 14                                              | 18                                              | 44%                                                     | 56.25%                                                  | Non-synonymous variant | MDV034 |
| Farm A/dust 2 | 48554                  | C            | T            | 9.68%                  | 114                                             | 54                                              | 13                                              | 5                                               | 72%                                                     | 27.78%                                                  | Non-synonymous variant | MDV040 |
| Farm A/dust 2 | 109048                 | G            | A            | 5.57%                  | 186                                             | 102                                             | 2                                               | 15                                              | 12%                                                     | 88.24%                                                  | Genic_UTR              | MDV072 |
| Farm A/dust 2 | 115422                 | C            | T            | 2.47%                  | 178                                             | 134                                             | 1                                               | 7                                               | 13%                                                     | 87.50%                                                  | Intergenic             | N/A    |
| Farm A/dust 2 | 115441                 | A            | C            | 2.20%                  | 129                                             | 225                                             | 6                                               | 2                                               | 75%                                                     | 25.00%                                                  | Intergenic             | N/A    |
| Farm A/dust 2 | 116937                 | G            | A            | 12.67%                 | 86                                              | 176                                             | 11                                              | 27                                              | 29%                                                     | 71.05%                                                  | Intergenic             | N/A    |
| Farm A/dust 2 | 121872                 | T            | C            | 36.76%                 | 52                                              | 108                                             | 35                                              | 58                                              | 38%                                                     | 62.37%                                                  | Genic_UTR              | MDV076 |
| Farm A/dust 2 | 126692                 | C            | G            | 26.35%                 | 108                                             | 1                                               | 33                                              | 6                                               | 85%                                                     | 15.38%                                                  | Intergenic             | N/A    |
| Farm A/dust 2 | 126693                 | C            | T            | 27.21%                 | 105                                             | 1                                               | 33                                              | 7                                               | 83%                                                     | 17.50%                                                  | Intergenic             | N/A    |
| Farm A/dust 2 | 130968                 | G            | T            | 43.48%                 | 77                                              | 105                                             | 52                                              | 88                                              | 37%                                                     | 62.86%                                                  | Non-synonymous variant | MDV084 |
| Farm A/dust 2 | 137156                 | C            | A            | 5.17%                  | 81                                              | 139                                             | 4                                               | 8                                               | 33%                                                     | 66.67%                                                  | Intergenic             | N/A    |
| Farm A/dust 2 | 137320                 | T            | A            | 9.94%                  | 120                                             | 41                                              | 3                                               | 15                                              | 17%                                                     | 83.33%                                                  | Intergenic             | N/A    |
| Farm A/dust 2 | 138433                 | C            | A            | 6.50%                  | 215                                             | 85                                              | 13                                              | 8                                               | 62%                                                     | 38.10%                                                  | Intergenic             | N/A    |
| Farm A/dust 2 | 138434                 | T            | A            | 4.43%                  | 202                                             | 89                                              | 7                                               | 7                                               | 50%                                                     | 50.00%                                                  | Intergenic             | N/A    |
| Farm A/dust 2 | 138436                 | C            | G            | 7.06%                  | 221                                             | 93                                              | 18                                              | 6                                               | 75%                                                     | 25.00%                                                  | Intergenic             | N/A    |
| Farm A/dust 2 | 138437                 | T            | A            | 8.12%                  | 219                                             | 96                                              | 20                                              | 8                                               | 71%                                                     | 28.57%                                                  | Intergenic             | N/A    |
| Farm A/dust 2 | 138451                 | G            | A            | 2.42%                  | 244                                             | 110                                             | 4                                               | 5                                               | 44%                                                     | 55.56%                                                  | Intergenic             | N/A    |
| Farm A/dust 2 | 138505                 | C            | A            | 28.26%                 | 75                                              | 139                                             | 58                                              | 33                                              | 64%                                                     | 36.26%                                                  | Intergenic             | N/A    |
| Farm A/dust 2 | 138506                 | A            | C            | 8.97%                  | 122                                             | 162                                             | 15                                              | 13                                              | 54%                                                     | 46.43%                                                  | Intergenic             | N/A    |
| Farm A/dust 2 | 138593                 | C            | G            | 6.17%                  | 81                                              | 222                                             | 10                                              | 10                                              | 50%                                                     | 50.00%                                                  | Intergenic             | N/A    |
| Farm A/dust 2 | 138594                 | G            | A            | 12.81%                 | 76                                              | 203                                             | 13                                              | 28                                              | 32%                                                     | 68.29%                                                  | Intergenic             | N/A    |
| Farm A/dust 2 | 138595                 | G            | C            | 5.02%                  | 84                                              | 219                                             | 7                                               | 9                                               | 44%                                                     | 56.25%                                                  | Intergenic             | N/A    |
| Farm A/dust 2 | 138596                 | T            | C            | 5.61%                  | 81                                              | 220                                             | 10                                              | 8                                               | 56%                                                     | 44.44%                                                  | Intergenic             | N/A    |
| Farm A/dust 2 | 138599                 | A            | C            | 5.38%                  | 87                                              | 211                                             | 5                                               | 12                                              | 29%                                                     | 70.59%                                                  | Intergenic             | N/A    |
| Farm A/dust 2 | 138600                 | G            | C            | 2.59%                  | 90                                              | 210                                             | 1                                               | 7                                               | 13%                                                     | 87.50%                                                  | Intergenic             | N/A    |
| Farm A/dust 2 | 138600                 | G            | C            | 2.59%                  | 90                                              | 210                                             | 1                                               | 7                                               | 13%                                                     | 87.50%                                                  | Intergenic             | N/A    |
| Farm A/dust 2 | 138601                 | G            | T            | 2.97%                  | 81                                              | 213                                             | 6                                               | 3                                               | 67%                                                     | 33.33%                                                  | Intergenic             | N/A    |
| Farm A/dust 2 | 138601                 | G            | T            | 2.97%                  | 81                                              | 213                                             | 6                                               | 3                                               | 67%                                                     | 33.33%                                                  | Intergenic             | N/A    |
| Farm A/dust 2 | 138602                 | G            | C            | 4.15%                  | 77                                              | 197                                             | 3                                               | 9                                               | 25%                                                     | 75.00%                                                  | Intergenic             | N/A    |
| Farm A/dust 2 | 138602                 | G            | C            | 4.15%                  | 77                                              | 197                                             | 3                                               | 9                                               | 25%                                                     | 75.00%                                                  | Intergenic             | N/A    |
| Farm A/dust 2 | 138604                 | A            | C            | 4.96%                  | 77                                              | 191                                             | 5                                               | 9                                               | 36%                                                     | 64.29%                                                  | Intergenic             | N/A    |
| Farm A/dust 2 | 138604                 | A            | C            | 4.96%                  | 77                                              | 191                                             | 5                                               | 9                                               | 36%                                                     | 64.29%                                                  | Intergenic             | N/A    |
| Farm A/dust 2 | 138606                 | A            | T            | 4.63%                  | 75                                              | 192                                             | 3                                               | 10                                              | 23%                                                     | 76.92%                                                  | Intergenic             | N/A    |
| Farm A/dust 2 | 138606                 | A            | T            | 4.63%                  | 75                                              | 192                                             | 3                                               | 10                                              | 23%                                                     | 76.92%                                                  | Intergenic             | N/A    |
| Farm A/dust 2 | 138748                 | A            | G            | 17.82%                 | 12                                              | 65                                              | 5                                               | 13                                              | 28%                                                     | 72.22%                                                  | Intergenic             | N/A    |
| Farm A/dust 2 | 138748                 | A            | G            | 17.82%                 | 12                                              | 65                                              | 5                                               | 13                                              | 28%                                                     | 72.22%                                                  | Intergenic             | N/A    |

**Farm B/dust (low stringency)**

| Isolate     | Position in the genome | Major allele | Minor allele | Minor allele frequency | Reads supporting major allele on forward strand | Reads supporting major allele on reverse strand | Reads supporting minor allele on forward strand | Reads supporting minor allele on reverse strand | Percent reads supporting minor allele on forward strand | Percent reads supporting minor allele on reverse strand | Type of variation      | Gene   |
|-------------|------------------------|--------------|--------------|------------------------|-------------------------------------------------|-------------------------------------------------|-------------------------------------------------|-------------------------------------------------|---------------------------------------------------------|---------------------------------------------------------|------------------------|--------|
| Farm B/dust | 2072                   | T            | G            | 44%                    | 90                                              | 43                                              | 66                                              | 37                                              | 64%                                                     | 36%                                                     | Non-synonymous variant | MDV010 |
| Farm B/dust | 4411                   | G            | T            | 44%                    | 18                                              | 80                                              | 14                                              | 64                                              | 18%                                                     | 82%                                                     | Non-synonymous variant | MDV012 |
| Farm B/dust | 13809                  | G            | C            | 3%                     | 173                                             | 133                                             | 4                                               | 4                                               | 50%                                                     | 50%                                                     | Non-synonymous variant | MDV019 |
| Farm B/dust | 15775                  | C            | T            | 46%                    | 94                                              | 53                                              | 78                                              | 46                                              | 63%                                                     | 37%                                                     | Synonymous variant     | MDV020 |
| Farm B/dust | 65764                  | G            | A            | 10%                    | 66                                              | 93                                              | 3                                               | 14                                              | 18%                                                     | 82%                                                     | Non-synonymous variant | MDV049 |
| Farm B/dust | 65773                  | G            | T            | 16%                    | 62                                              | 95                                              | 4                                               | 26                                              | 13%                                                     | 87%                                                     | Non-synonymous variant | MDV049 |
| Farm B/dust | 65796                  | A            | G            | 35%                    | 53                                              | 85                                              | 9                                               | 66                                              | 12%                                                     | 88%                                                     | Synonymous variant     | MDV049 |
| Farm B/dust | 65804                  | A            | T            | 34%                    | 61                                              | 89                                              | 11                                              | 67                                              | 14%                                                     | 86%                                                     | Non-synonymous variant | MDV049 |
| Farm B/dust | 65821                  | G            | T            | 34%                    | 53                                              | 83                                              | 8                                               | 63                                              | 11%                                                     | 89%                                                     | Non-synonymous variant | MDV049 |
| Farm B/dust | 65843                  | A            | G            | 11%                    | 39                                              | 118                                             | 5                                               | 15                                              | 25%                                                     | 75%                                                     | Non-synonymous variant | MDV049 |
| Farm B/dust | 85939                  | A            | C            | 95%                    | 0                                               | 2                                               | 15                                              | 21                                              | 42%                                                     | 58%                                                     | Non-synonymous variant | MDV055 |
| Farm B/dust | 85954                  | C            | T            | 29%                    | 14                                              | 18                                              | 11                                              | 2                                               | 85%                                                     | 15%                                                     | Non-synonymous variant | MDV055 |
| Farm B/dust | 85959                  | C            | A            | 36%                    | 22                                              | 17                                              | 16                                              | 6                                               | 73%                                                     | 27%                                                     | Non-synonymous variant | MDV055 |
| Farm B/dust | 85961                  | C            | A            | 39%                    | 28                                              | 16                                              | 20                                              | 8                                               | 71%                                                     | 29%                                                     | Non-synonymous variant | MDV055 |
| Farm B/dust | 85962                  | G            | A            | 40%                    | 25                                              | 10                                              | 19                                              | 4                                               | 83%                                                     | 17%                                                     | Non-synonymous variant | MDV055 |
| Farm B/dust | 85963                  | T            | C            | 56%                    | 7                                               | 12                                              | 18                                              | 6                                               | 75%                                                     | 25%                                                     | Non-synonymous variant | MDV055 |
| Farm B/dust | 85966                  | G            | A            | 9%                     | 46                                              | 22                                              | 3                                               | 4                                               | 43%                                                     | 57%                                                     | Non-synonymous variant | MDV055 |
| Farm B/dust | 85971                  | G            | C            | 11%                    | 47                                              | 18                                              | 4                                               | 4                                               | 50%                                                     | 50%                                                     | Non-synonymous variant | MDV055 |
| Farm B/dust | 85974                  | G            | C            | 9%                     | 49                                              | 21                                              | 2                                               | 5                                               | 29%                                                     | 71%                                                     | Non-synonymous variant | MDV055 |
| Farm B/dust | 86626                  | T            | C            | 40%                    | 114                                             | 78                                              | 78                                              | 51                                              | 60%                                                     | 40%                                                     | Non-synonymous variant | MDV056 |
| Farm B/dust | 108743                 | T            | C            | 42%                    | 173                                             | 95                                              | 119                                             | 73                                              | 62%                                                     | 38%                                                     | Genic_UTR              | MDV072 |
| Farm B/dust | 108856                 | G            | A            | 10%                    | 254                                             | 164                                             | 6                                               | 41                                              | 13%                                                     | 87%                                                     | Genic_UTR              | MDV072 |
| Farm B/dust | 108899                 | A            | G            | 11%                    | 227                                             | 192                                             | 7                                               | 45                                              | 13%                                                     | 87%                                                     | Genic_UTR              | MDV072 |
| Farm B/dust | 109012                 | T            | C            | 5%                     | 184                                             | 176                                             | 2                                               | 16                                              | 11%                                                     | 89%                                                     | Genic_UTR              | MDV072 |
| Farm B/dust | 114927                 | T            | G            | 2%                     | 331                                             | 276                                             | 13                                              | 2                                               | 87%                                                     | 13%                                                     | Intergenic             | N/A    |
| Farm B/dust | 115231                 | A            | C            | 22%                    | 127                                             | 221                                             | 36                                              | 61                                              | 37%                                                     | 63%                                                     | Intergenic             | N/A    |
| Farm B/dust | 115232                 | A            | C            | 15%                    | 161                                             | 270                                             | 19                                              | 57                                              | 25%                                                     | 75%                                                     | Intergenic             | N/A    |
| Farm B/dust | 115241                 | C            | A            | 4%                     | 155                                             | 360                                             | 17                                              | 6                                               | 74%                                                     | 26%                                                     | Intergenic             | N/A    |
| Farm B/dust | 116288                 | T            | A            | 2%                     | 309                                             | 248                                             | 3                                               | 9                                               | 25%                                                     | 75%                                                     | Intergenic             | N/A    |
| Farm B/dust | 120327                 | A            | G            | 29%                    | 4                                               | 64                                              | 3                                               | 25                                              | 11%                                                     | 89%                                                     | Intergenic             | N/A    |
| Farm B/dust | 121181                 | A            | C            | 2%                     | 203                                             | 194                                             | 4                                               | 6                                               | 40%                                                     | 60%                                                     | Non-synonymous variant | MDV076 |
| Farm B/dust | 121656                 | C            | T            | 37%                    | 76                                              | 118                                             | 43                                              | 72                                              | 37%                                                     | 63%                                                     | Genic_UTR              | MDV076 |
| Farm B/dust | 122052                 | A            | T            | 3%                     | 381                                             | 231                                             | 14                                              | 3                                               | 82%                                                     | 18%                                                     | Genic_UTR              | MDV076 |
| Farm B/dust | 124841                 | T            | C            | 42%                    | 188                                             | 151                                             | 130                                             | 113                                             | 53%                                                     | 47%                                                     | Intergenic             | N/A    |
| Farm B/dust | 127347                 | G            | T            | 42%                    | 35                                              | 178                                             | 22                                              | 130                                             | 14%                                                     | 86%                                                     | Intergenic             | N/A    |
| Farm B/dust | 137081                 | A            | C            | 4%                     | 97                                              | 66                                              | 1                                               | 6                                               | 14%                                                     | 86%                                                     | Intergenic             | N/A    |
| Farm B/dust | 137101                 | A            | G            | 2%                     | 137                                             | 198                                             | 7                                               | 1                                               | 88%                                                     | 13%                                                     | Intergenic             | N/A    |
| Farm B/dust | 137102                 | A            | G            | 4%                     | 119                                             | 199                                             | 10                                              | 2                                               | 83%                                                     | 17%                                                     | Intergenic             | N/A    |
| Farm B/dust | 137249                 | A            | G            | 3%                     | 112                                             | 193                                             | 7                                               | 1                                               | 88%                                                     | 13%                                                     | Intergenic             | N/A    |
| Farm B/dust | 137449                 | A            | C            | 45%                    | 149                                             | 62                                              | 103                                             | 70                                              | 60%                                                     | 40%                                                     | Intergenic             | N/A    |
| Farm B/dust | 138195                 | C            | A            | 4%                     | 402                                             | 137                                             | 15                                              | 5                                               | 75%                                                     | 25%                                                     | Intergenic             | N/A    |
| Farm B/dust | 138196                 | T            | A            | 3%                     | 383                                             | 138                                             | 10                                              | 7                                               | 59%                                                     | 41%                                                     | Intergenic             | N/A    |
| Farm B/dust | 138198                 | C            | G            | 5%                     | 405                                             | 142                                             | 18                                              | 8                                               | 69%                                                     | 31%                                                     | Intergenic             | N/A    |
| Farm B/dust | 138199                 | T            | A            | 6%                     | 393                                             | 142                                             | 24                                              | 8                                               | 75%                                                     | 25%                                                     | Intergenic             | N/A    |
| Farm B/dust | 138266                 | C            | A            | 4%                     | 266                                             | 386                                             | 19                                              | 9                                               | 68%                                                     | 32%                                                     | Intergenic             | N/A    |
| Farm B/dust | 138267                 | C            | A            | 37%                    | 145                                             | 231                                             | 81                                              | 142                                             | 36%                                                     | 64%                                                     | Intergenic             | N/A    |
| Farm B/dust | 138268                 | A            | C            | 8%                     | 188                                             | 396                                             | 25                                              | 24                                              | 51%                                                     | 49%                                                     | Intergenic             | N/A    |
| Farm B/dust | 138355                 | C            | G            | 5%                     | 83                                              | 407                                             | 9                                               | 18                                              | 33%                                                     | 67%                                                     | Intergenic             | N/A    |
| Farm B/dust | 138356                 | G            | A            | 13%                    | 74                                              | 368                                             | 15                                              | 51                                              | 23%                                                     | 77%                                                     | Intergenic             | N/A    |
| Farm B/dust | 138357                 | G            | C            | 4%                     | 83                                              | 397                                             | 5                                               | 14                                              | 26%                                                     | 74%                                                     | Intergenic             | N/A    |
| Farm B/dust | 138358                 | T            | C            | 4%                     | 82                                              | 399                                             | 8                                               | 12                                              | 40%                                                     | 60%                                                     | Intergenic             | N/A    |
| Farm B/dust | 138361                 | A            | C            | 5%                     | 89                                              | 381                                             | 6                                               | 20                                              | 23%                                                     | 77%                                                     | Intergenic             | N/A    |
| Farm B/dust | 138362                 | G            | C            | 3%                     | 95                                              | 379                                             | 2                                               | 11                                              | 15%                                                     | 85%                                                     | Intergenic             | N/A    |
| Farm B/dust | 138364                 | G            | C            | 4%                     | 80                                              | 355                                             | 5                                               | 15                                              | 25%                                                     | 75%                                                     | Intergenic             | N/A    |
| Farm B/dust | 138366                 | A            | C            | 5%                     | 79                                              | 343                                             | 8                                               | 14                                              | 36%                                                     | 64%                                                     | Intergenic             | N/A    |
| Farm B/dust | 138368                 | A            | T            | 3%                     | 79                                              | 345                                             | 2                                               | 13                                              | 13%                                                     | 87%                                                     | Intergenic             | N/A    |
| Farm B/dust | 138476                 | A            | C            | 4%                     | 111                                             | 79                                              | 2                                               | 5                                               | 29%                                                     | 71%                                                     | Intergenic             | N/A    |
| Farm B/dust | 138510                 | A            | G            | 28%                    | 25                                              | 73                                              | 10                                              | 28                                              | 26%                                                     | 74%                                                     | Intergenic             | N/A    |

Farm B/feather 1 (low stringency)

| Isolate          | Position in the genome | Major allele | Minor allele | Minor allele frequency | Reads supporting major allele on forward strand | Reads supporting major allele on reverse strand | Reads supporting minor allele on forward strand | Reads supporting minor allele on reverse strand | Percent reads supporting minor allele on forward strand | Percent reads supporting minor allele on reverse strand | Type of variation      | Gene   |
|------------------|------------------------|--------------|--------------|------------------------|-------------------------------------------------|-------------------------------------------------|-------------------------------------------------|-------------------------------------------------|---------------------------------------------------------|---------------------------------------------------------|------------------------|--------|
| Farm B/feather 1 | 12176                  | C            | A            | 15.56%                 | 17                                              | 20                                              | 6                                               | 1                                               | 86%                                                     | 14%                                                     | Non-synonymous variant | MDV018 |
| Farm B/feather 1 | 23126                  | G            | T            | 12.28%                 | 28                                              | 21                                              | 2                                               | 5                                               | 29%                                                     | 71%                                                     | Non-synonymous variant | MDV025 |

Farm B/feather 2 (low stringency)

| Isolate          | Position in the genome | Major allele | Minor allele | Minor allele frequency | Reads supporting major allele on forward strand | Reads supporting major allele on reverse strand | Reads supporting minor allele on forward strand | Reads supporting minor allele on reverse strand | Percent reads supporting minor allele on forward strand | Percent reads supporting minor allele on reverse strand | Type of variation      | Gene   |
|------------------|------------------------|--------------|--------------|------------------------|-------------------------------------------------|-------------------------------------------------|-------------------------------------------------|-------------------------------------------------|---------------------------------------------------------|---------------------------------------------------------|------------------------|--------|
| Farm B/feather 2 | 122174                 | C            | T            | 10.94%                 | 32                                              | 25                                              | 1                                               | 6                                               | 14%                                                     | 85.71%                                                  | Genic_UTR              | MDV076 |
| Farm B/feather 2 | 122204                 | C            | T            | 15.79%                 | 21                                              | 27                                              | 2                                               | 7                                               | 22%                                                     | 77.78%                                                  | Genic_UTR              | MDV076 |
| Farm B/feather 2 | 128489                 | G            | T            | 10.13%                 | 38                                              | 33                                              | 2                                               | 6                                               | 25%                                                     | 75.00%                                                  | Intergenic             | N/A    |
| Farm B/feather 2 | 144479                 | C            | A            | 14.00%                 | 33                                              | 10                                              | 5                                               | 2                                               | 71%                                                     | 28.57%                                                  | Non-synonymous variant | MDV092 |



**Farm A/dust 1 (high stringency)**

| Isolate       | Position in the genome | Major allele | Minor allele | Minor allele frequency | Reads supporting major allele on forward strand | Reads supporting major allele on reverse strand | Reads supporting minor allele on forward strand | Reads supporting minor allele on reverse strand | Percent reads supporting minor allele on forward strand | Percent reads supporting minor allele on reverse strand | Type of variation | Gene |
|---------------|------------------------|--------------|--------------|------------------------|-------------------------------------------------|-------------------------------------------------|-------------------------------------------------|-------------------------------------------------|---------------------------------------------------------|---------------------------------------------------------|-------------------|------|
| Farm A/dust 1 | 115376                 | C            | A            | 8.16%                  | 93                                              | 42                                              | 6                                               | 6                                               | 50%                                                     | 50.00%                                                  | Intergenic        | N/A  |
| Farm A/dust 1 | 115377                 | C            | A            | 29.20%                 | 51                                              | 29                                              | 21                                              | 12                                              | 64%                                                     | 36.36%                                                  | Intergenic        | N/A  |
| Farm A/dust 1 | 137099                 | A            | C            | 34.74%                 | 42                                              | 20                                              | 18                                              | 15                                              | 55%                                                     | 45.45%                                                  | Intergenic        | N/A  |
| Farm A/dust 1 | 137101                 | A            | C            | 5.93%                  | 75                                              | 36                                              | 4                                               | 3                                               | 57%                                                     | 42.86%                                                  | Intergenic        | N/A  |
| Farm A/dust 1 | 137264                 | A            | G            | 5.22%                  | 87                                              | 40                                              | 5                                               | 2                                               | 71%                                                     | 28.57%                                                  | Intergenic        | N/A  |
| Farm A/dust 1 | 138209                 | C            | A            | 8.27%                  | 88                                              | 34                                              | 8                                               | 3                                               | 73%                                                     | 27.27%                                                  | Intergenic        | N/A  |
| Farm A/dust 1 | 138281                 | A            | C            | 12.82%                 | 47                                              | 21                                              | 6                                               | 4                                               | 60%                                                     | 40.00%                                                  | Intergenic        | N/A  |

**Farm A/dust 2 (high stringency)**

| Isolate       | Position in the genome | Major allele | Minor allele | Minor allele frequency | Reads supporting major allele on forward strand | Reads supporting major allele on reverse strand | Reads supporting minor allele on forward strand | Reads supporting minor allele on reverse strand | Percent reads supporting minor allele on forward strand | Percent reads supporting minor allele on reverse strand | Type of variation      | Gene   |
|---------------|------------------------|--------------|--------------|------------------------|-------------------------------------------------|-------------------------------------------------|-------------------------------------------------|-------------------------------------------------|---------------------------------------------------------|---------------------------------------------------------|------------------------|--------|
| Farm A/dust 2 | 40519                  | G            | A            | 19.88%                 | 51                                              | 78                                              | 14                                              | 18                                              | 44%                                                     | 56%                                                     | Non-synonymous variant | MDV034 |
| Farm A/dust 2 | 48554                  | C            | T            | 9.68%                  | 114                                             | 54                                              | 13                                              | 5                                               | 72%                                                     | 28%                                                     | Non-synonymous variant | MDV040 |
| Farm A/dust 2 | 116937                 | G            | A            | 12.67%                 | 86                                              | 176                                             | 11                                              | 27                                              | 29%                                                     | 71%                                                     | Intergenic             | N/A    |
| Farm A/dust 2 | 121872                 | T            | C            | 36.76%                 | 52                                              | 108                                             | 35                                              | 58                                              | 38%                                                     | 62%                                                     | Genic_UTR              | MDV076 |
| Farm A/dust 2 | 130968                 | G            | T            | 43.48%                 | 77                                              | 105                                             | 52                                              | 88                                              | 37%                                                     | 63%                                                     | Non-synonymous variant | MDV084 |
| Farm A/dust 2 | 137156                 | C            | A            | 5.17%                  | 81                                              | 139                                             | 4                                               | 8                                               | 33%                                                     | 67%                                                     | Intergenic             | N/A    |
| Farm A/dust 2 | 138433                 | C            | A            | 6.54%                  | 215                                             | 85                                              | 13                                              | 8                                               | 62%                                                     | 38%                                                     | Intergenic             | N/A    |
| Farm A/dust 2 | 138436                 | C            | G            | 7.12%                  | 221                                             | 92                                              | 18                                              | 6                                               | 75%                                                     | 25%                                                     | Intergenic             | N/A    |
| Farm A/dust 2 | 138437                 | T            | A            | 8.19%                  | 218                                             | 96                                              | 20                                              | 8                                               | 71%                                                     | 29%                                                     | Intergenic             | N/A    |
| Farm A/dust 2 | 138505                 | C            | A            | 28.91%                 | 73                                              | 136                                             | 52                                              | 33                                              | 61%                                                     | 39%                                                     | Intergenic             | N/A    |
| Farm A/dust 2 | 138506                 | A            | C            | 9.15%                  | 117                                             | 161                                             | 15                                              | 13                                              | 54%                                                     | 46%                                                     | Intergenic             | N/A    |
| Farm A/dust 2 | 138593                 | C            | G            | 6.19%                  | 81                                              | 222                                             | 10                                              | 10                                              | 50%                                                     | 50%                                                     | Intergenic             | N/A    |
| Farm A/dust 2 | 138594                 | G            | A            | 12.81%                 | 76                                              | 203                                             | 13                                              | 28                                              | 32%                                                     | 68%                                                     | Intergenic             | N/A    |
| Farm A/dust 2 | 138596                 | T            | C            | 5.35%                  | 81                                              | 220                                             | 9                                               | 8                                               | 53%                                                     | 47%                                                     | Intergenic             | N/A    |
| Farm A/dust 2 | 138599                 | A            | C            | 5.40%                  | 87                                              | 211                                             | 5                                               | 12                                              | 29%                                                     | 71%                                                     | Intergenic             | N/A    |
| Farm A/dust 2 | 138748                 | A            | G            | 19.15%                 | 12                                              | 64                                              | 5                                               | 13                                              | 28%                                                     | 72%                                                     | Intergenic             | N/A    |

**Farm B/dust (high stringency)**

| Isolate     | Position in the genome | Major allele | Minor allele | Minor allele frequency | Reads supporting major allele on forward strand | Reads supporting major allele on reverse strand | Reads supporting minor allele on forward strand | Reads supporting minor allele on reverse strand | Percent reads supporting minor allele on forward strand | Percent reads supporting minor allele on reverse strand | Type of variation      | Gene   |
|-------------|------------------------|--------------|--------------|------------------------|-------------------------------------------------|-------------------------------------------------|-------------------------------------------------|-------------------------------------------------|---------------------------------------------------------|---------------------------------------------------------|------------------------|--------|
| Farm B/dust | 2072                   | T            | G            | 43.64%                 | 90                                              | 43                                              | 66                                              | 37                                              | 64%                                                     | 36%                                                     | Non-synonymous variant | MDV010 |
| Farm B/dust | 15775                  | C            | T            | 45.76%                 | 94                                              | 53                                              | 78                                              | 46                                              | 63%                                                     | 37%                                                     | Synonymous variant     | MDV020 |
| Farm B/dust | 65843                  | A            | G            | 11.30%                 | 39                                              | 118                                             | 5                                               | 15                                              | 25%                                                     | 75%                                                     | Non-synonymous variant | MDV049 |
| Farm B/dust | 86626                  | T            | C            | 40.19%                 | 114                                             | 78                                              | 78                                              | 51                                              | 60%                                                     | 40%                                                     | Non-synonymous variant | MDV056 |
| Farm B/dust | 108743                 | T            | C            | 41.74%                 | 173                                             | 95                                              | 119                                             | 73                                              | 62%                                                     | 38%                                                     | Genic_UTR              | MDV072 |
| Farm B/dust | 115231                 | A            | C            | 21.80%                 | 127                                             | 221                                             | 36                                              | 61                                              | 37%                                                     | 63%                                                     | Intergenic             | N/A    |
| Farm B/dust | 115232                 | A            | C            | 14.99%                 | 161                                             | 270                                             | 19                                              | 57                                              | 25%                                                     | 75%                                                     | Intergenic             | N/A    |
| Farm B/dust | 121656                 | C            | T            | 37.22%                 | 76                                              | 118                                             | 43                                              | 72                                              | 37%                                                     | 63%                                                     | Genic_UTR              | MDV076 |
| Farm B/dust | 124841                 | T            | C            | 41.75%                 | 188                                             | 151                                             | 130                                             | 113                                             | 53%                                                     | 47%                                                     | Intergenic             | N/A    |
| Farm B/dust | 137449                 | A            | C            | 45.05%                 | 149                                             | 62                                              | 103                                             | 70                                              | 60%                                                     | 40%                                                     | Intergenic             | N/A    |
| Farm B/dust | 138199                 | T            | A            | 5.64%                  | 393                                             | 142                                             | 24                                              | 8                                               | 75%                                                     | 25%                                                     | Intergenic             | N/A    |
| Farm B/dust | 138267                 | C            | A            | 37.23%                 | 145                                             | 231                                             | 81                                              | 142                                             | 36%                                                     | 64%                                                     | Intergenic             | N/A    |
| Farm B/dust | 138268                 | A            | C            | 7.74%                  | 188                                             | 396                                             | 25                                              | 24                                              | 51%                                                     | 49%                                                     | Intergenic             | N/A    |
| Farm B/dust | 138355                 | C            | G            | 5.22%                  | 83                                              | 407                                             | 9                                               | 18                                              | 33%                                                     | 67%                                                     | Intergenic             | N/A    |
| Farm B/dust | 138356                 | G            | A            | 12.99%                 | 74                                              | 368                                             | 15                                              | 51                                              | 23%                                                     | 77%                                                     | Intergenic             | N/A    |
| Farm B/dust | 138361                 | A            | C            | 5.24%                  | 89                                              | 381                                             | 6                                               | 20                                              | 23%                                                     | 77%                                                     | Intergenic             | N/A    |
| Farm B/dust | 138510                 | A            | G            | 27.94%                 | 25                                              | 73                                              | 10                                              | 28                                              | 26%                                                     | 74%                                                     | Intergenic             | N/A    |

| Family Name           | Farm B-<br>dust | Farm B-<br>feather 1 | Farm B-<br>feather 2 | Farm A-<br>dust 1 | Farm A-<br>dust 2 |
|-----------------------|-----------------|----------------------|----------------------|-------------------|-------------------|
| Chicken               | 19,119,306      | 212,314              | 121,060              | 11,783,342        | 21,215,016        |
| Herpesviridae         | 1,372,838       | 103,939              | 165,216              | 370,393           | 512,531           |
| Bovidae               | 1,131,177       | -                    | -                    | 8,055             | 39,873            |
| Bradyrhizobiaceae     | 986,082         | -                    | -                    | 682               | 99,710            |
| Dermabacteraceae      | 605,631         | -                    | -                    | 75,916            | 375,290           |
| <100                  | 570,555         | 50,009               | 27,895               | 794,467           | 533,986           |
| Staphylococcaceae     | 337,057         | -                    | -                    | 178,747           | 240,507           |
| Corynebacteriaceae    | 229,208         | -                    | -                    | 52,055            | 129,345           |
| unclassified          | 196,911         | -                    | -                    | 147,502           | 109,899           |
| Lactobacillaceae      | 196,157         | -                    | -                    | 147,351           | 195,604           |
| Babesiidae            | 141,039         | -                    | -                    | 3,930             | 10,966            |
| Bacillaceae           | 104,791         | -                    | -                    | 77,052            | 97,930            |
| Vira                  | 102,266         | -                    | -                    | 7,700             | 31,685            |
| Sphingobacteriaceae   | 77,220          | -                    | -                    | 36,775            | 68,077            |
| Bacteroidaceae        | 72,040          | -                    | -                    | 32,391            | 64,454            |
| Streptococcaceae      | 63,088          | -                    | -                    | 23,633            | 42,208            |
| Actinoplanaceae       | 55,273          | -                    | -                    | 19,379            | 52,946            |
| Lachnospiraceae       | 54,841          | -                    | -                    | 35,767            | 100,136           |
| Siphoviridae          | 54,286          | -                    | -                    | 28,164            | 74,766            |
| Clostridiaceae        | 53,824          | -                    | -                    | 18,827            | 43,915            |
| biota                 | 53,379          | -                    | -                    | 20,321            | 64,013            |
| Peptostreptococcaceae | 49,713          | -                    | -                    | 4,585             | 29,781            |
| Gramineae             | 48,512          | 6,145                | 13,189               | 17,909            | 59,709            |
| Meleagrididae         | 47,292          | 9,570                | 6,352                | 16,493            | 76,814            |
| Ruminococcaceae       | 36,850          | -                    | -                    | 22,980            | 63,335            |
| Methylobacteriaceae   | 35,567          | 2,660                | 5,205                | 356               | 58,844            |
| Enterobacteraceae     | 35,496          | -                    | -                    | 11,304            | 72,340            |
| Micrococcaceae        | 30,584          | -                    | -                    | 13,502            | 28,318            |
| other sequences       | 27,430          | 1,678                | 3,012                | 10,400            | 14,568            |
| Nocardiaceae          | 26,664          | -                    | -                    | 6,869             | 20,515            |
| Myoviridae            | 25,744          | -                    | -                    | 26,447            | 56,563            |
| Actinosynnemataceae   | 24,644          | -                    | -                    | 7,354             | 21,047            |
| Enterococcaceae       | 24,224          | -                    | -                    | 13,055            | 23,442            |
| Mycobacteriaceae      | 23,366          | -                    | -                    | 6,151             | 18,818            |
| Pseudomonadaceae      | 21,552          | -                    | -                    | 2,478             | 11,341            |
| Burkholderiaceae      | 21,347          | -                    | -                    | -                 | 5,960             |
| Rhizobiaceae          | 16,069          | -                    | -                    | 103               | 4,745             |
| Propionibacteriaceae  | 15,405          | -                    | 148                  | 6,197             | 12,459            |
| Nocardiopsaceae       | 14,995          | -                    | -                    | 11,804            | 22,330            |
| Sphingomonadaceae     | 14,945          | -                    | -                    | 407               | 15,444            |
| Campylobacter group   | 13,811          | -                    | -                    | 6,182             | 5,466             |
| Porphyromonadaceae    | 13,008          | -                    | -                    | 6,759             | 25,153            |
| Comamonadaceae        | 11,483          | -                    | -                    | 623               | 6,288             |
| Rikenellaceae         | 11,272          | -                    | -                    | 13,944            | 61,763            |
| Cellulomonadaceae     | 10,982          | -                    | -                    | 3,894             | 9,435             |
| Xanthobacteraceae     | 10,979          | -                    | -                    | 389               | 2,367             |
| Rhodospirillaceae     | 10,498          | -                    | -                    | 499               | 3,578             |
| Microbacteriaceae     | 9,978           | -                    | -                    | 3,217             | 8,655             |
| Cervidae              | 9,471           | -                    | -                    | -                 | -                 |
| Lysobacteraceae       | 9,311           | -                    | -                    | 1,026             | 5,336             |
| Phyllobacteriaceae    | 9,070           | -                    | -                    | 217               | 2,283             |
| Promicromonosporaceae | 8,756           | -                    | -                    | 2,975             | 7,802             |
| Dermacoccaceae        | 8,713           | -                    | -                    | 2,667             | 7,232             |
| Bifidobacteriaceae    | 8,667           | -                    | -                    | 5,241             | 52,059            |
| Coriobacteriaceae     | 7,818           | -                    | -                    | 6,884             | 12,377            |
| Geodermatophilaceae   | 7,635           | -                    | -                    | 2,153             | 6,594             |
| Paenibacillaceae      | 6,921           | -                    | -                    | 4,357             | 7,627             |
| Rhodobacteraceae      | 6,764           | -                    | -                    | 331               | 3,802             |
| Caulobacteraceae      | 6,531           | -                    | -                    | 685               | 2,499             |
| Listeriaceae          | 6,379           | -                    | -                    | 6,555             | 8,296             |
| Nocardioidaceae       | 6,376           | -                    | -                    | 2,592             | 5,286             |
| Gordoniaceae          | 6,318           | -                    | -                    | 1,779             | 4,944             |
| Pasteurellaceae       | 6,071           | -                    | -                    | 2,431             | 1,853             |
| Eubacteriaceae        | 5,647           | -                    | -                    | 3,392             | 8,423             |
| Flavobacteriaceae     | 5,492           | -                    | -                    | 3,837             | 4,432             |
| Erysipelothrix group  | 5,484           | -                    | -                    | 3,451             | 8,925             |
| Alcaligenaceae        | 5,223           | -                    | -                    | 561               | 2,550             |
| Frankiaceae           | 5,149           | -                    | -                    | 2,071             | 4,817             |
| Peptococcaceae        | 4,819           | -                    | -                    | 3,381             | 6,319             |

DNA from dust: the first field isolated genomes of MDV-1, from virions in poultry dust and chicken feather follicles.

| Family Name                                 | Farm B-<br>dust | Farm B-<br>feather 1 | Farm B-<br>feather 2 | Farm A-<br>dust 1 | Farm A-<br>dust 2 |
|---------------------------------------------|-----------------|----------------------|----------------------|-------------------|-------------------|
| Beutenbergiaceae                            | 4,723           | -                    | -                    | 1,786             | 4,091             |
| Sanguibacteraceae                           | 4,681           | -                    | -                    | 1,619             | 3,950             |
| Carnobacteriaceae                           | 4,362           | -                    | -                    | 3,804             | 4,445             |
| Kineosporiaceae                             | 4,278           | -                    | -                    | 1,351             | 4,031             |
| Catenulisporaceae                           | 4,007           | -                    | -                    | 973               | 2,611             |
| Megasphaera group                           | 3,758           | -                    | -                    | 2,066             | 4,526             |
| Rhodocyclaceae                              | 3,754           | -                    | -                    | 484               | 2,155             |
| Caryophanaceae                              | 3,378           | -                    | -                    | 2,287             | 3,492             |
| Oscillospiraceae                            | 3,268           | -                    | -                    | 2,227             | 5,981             |
| Delphinidae                                 | 3,118           | -                    | -                    | -                 | -                 |
| Intrasporangiaceae                          | 3,105           | -                    | -                    | 822               | 2,230             |
| Verrucomicrobia subdivision 1               | 2,960           | -                    | -                    | 134               | 2,274             |
| Aspergillaceae                              | 2,918           | -                    | -                    | -                 | -                 |
| Thermoanaerobacterales Family III. Incertae | 2,695           | -                    | -                    | 1,907             | 2,999             |
| Leuconostoc group                           | 2,675           | -                    | -                    | 2,382             | 3,363             |
| Acetobacteraceae                            | 2,675           | -                    | -                    | -                 | 1,164             |
| Oxalobacteraceae                            | 2,523           | -                    | -                    | 154               | 1,090             |
| Ancylobacter group                          | 2,446           | -                    | -                    | -                 | 977               |
| Microsphaeraceae                            | 2,427           | -                    | -                    | 773               | 2,196             |
| Desulfovibrionaceae                         | 2,370           | -                    | -                    | 605               | 3,042             |
| Actinomycetaceae                            | 2,328           | -                    | -                    | 1,052             | 1,947             |
| Tsukamurellaceae                            | 2,252           | -                    | -                    | 585               | 1,746             |
| Fusobacteriaceae                            | 2,232           | -                    | -                    | 872               | 1,807             |
| Acinetobacteraceae                          | 2,138           | -                    | -                    | 10,446            | 4,512             |
| Borrelomycetaceae                           | 2,006           | -                    | -                    | 546               | 1,011             |
| Cytophaga-Flexibacter group                 | 1,999           | -                    | -                    | 490               | 1,636             |
| Alcanivorax/Fundibacter group               | 1,945           | -                    | -                    | 484               | 1,729             |
| Sapromycetaceae                             | 1,943           | -                    | -                    | 1,103             | 1,606             |
| Spirochaetaceae                             | 1,866           | -                    | -                    | 1,069             | 3,796             |
| Muridae                                     | 1,847           | -                    | -                    | 1,525             | 3,953             |
| Ectothiorhodospira group                    | 1,784           | -                    | -                    | 121               | 1,441             |
| Deinococcaceae                              | 1,768           | -                    | -                    | 733               | 1,637             |
| Nymphalidae                                 | 1,764           | -                    | -                    | -                 | 112               |
| Glycomycetaceae                             | 1,732           | -                    | -                    | 575               | 1,515             |
| Thermoanaerobacteraceae                     | 1,659           | -                    | -                    | 850               | 2,119             |
| Prevotellaceae                              | 1,573           | -                    | -                    | 244               | 2,229             |
| Aeromonadaceae                              | 1,534           | -                    | -                    | 273               | 1,471             |
| Anaeromyxobacteraceae                       | 1,496           | -                    | -                    | 326               | 1,337             |
| Myxococcaceae                               | 1,458           | -                    | -                    | 443               | 1,417             |
| Microviridae                                | 1,430           | -                    | -                    | -                 | 758               |
| Geobacteraceae                              | 1,371           | -                    | -                    | 383               | 1,653             |
| Peptoniphilaceae                            | 1,357           | -                    | -                    | 820               | 1,317             |
| Chromobacteriaceae                          | 1,305           | -                    | -                    | 398               | 943               |
| Leptotrichiaceae                            | 1,302           | -                    | -                    | 674               | 1,496             |
| Sorangiaceae                                | 1,280           | -                    | -                    | 145               | 943               |
| Chromatiaceae                               | 1,264           | -                    | -                    | 127               | 963               |
| Rhodobiaceae                                | 1,239           | -                    | -                    | -                 | 245               |
| Spiroplasmataceae                           | 1,234           | -                    | -                    | 824               | 1,207             |
| Beijerinckiaceae                            | 1,198           | -                    | -                    | -                 | 338               |
| Halanaerobiaceae                            | 1,153           | -                    | -                    | 605               | 936               |
| Suidae                                      | 1,106           | -                    | -                    | 294               | 1,088             |
| Thermaceae                                  | 1,089           | -                    | -                    | 220               | 1,568             |
| Haloarchaeaceae                             | 1,084           | -                    | -                    | -                 | 215               |
| Sporolactobacillaceae                       | 1,084           | -                    | -                    | 885               | 1,221             |
| Conexibacteraceae                           | 1,070           | -                    | -                    | 235               | 832               |
| Brachyspiraceae                             | 1,065           | -                    | -                    | 572               | 1,003             |
| Acidobacteriaceae                           | 1,001           | -                    | -                    | -                 | 887               |
| Acidimicrobiaceae                           | 980             | -                    | -                    | 236               | 478               |
| Cercopitheidae                              | 882             | -                    | -                    | 600               | 1,146             |
| Hominidae                                   | 849             | -                    | -                    | 39,199            | 3,817             |
| Nolanaceae                                  | 847             | -                    | -                    | 4,110             | 926               |
| Acidaminococcaceae                          | 818             | -                    | -                    | 515               | 1,206             |
| Thermotogaceae                              | 794             | -                    | -                    | 456               | 624               |
| Chlorobiaceae                               | 774             | -                    | -                    | -                 | 954               |
| Clostridiales Family XVIII. Incertae Sedis  | 771             | -                    | -                    | 375               | 1,055             |
| Dietziaceae                                 | 755             | -                    | -                    | 129               | 338               |
| Methanobacteriaceae                         | 750             | -                    | -                    | 180               | 114               |
| Methylocystaceae                            | 739             | -                    | -                    | -                 | 202               |
| Aerococcaceae                               | 716             | -                    | -                    | 531               | 631               |

DNA from dust: the first field isolated genomes of MDV-1, from virions in poultry dust and chicken feather follicles.

| Family Name                                | Farm B-<br>dust | Farm B-<br>feather 1 | Farm B-<br>feather 2 | Farm A-<br>dust 1 | Farm A-<br>dust 2 |
|--------------------------------------------|-----------------|----------------------|----------------------|-------------------|-------------------|
| Jonesiaceae                                | 675             | -                    | -                    | 377               | 574               |
| Helicobacteraceae                          | 671             | -                    | -                    | -                 | 393               |
| Clostridiales Family XVII. Incertae Sedis  | 664             | -                    | -                    | 313               | 949               |
| Cyprinidae                                 | 650             | -                    | -                    | 108               | 174               |
| Methanomassiliicoccaceae                   | 632             | -                    | -                    | 435               | 690               |
| Haliangiaceae                              | 628             | -                    | -                    | 146               | 435               |
| Clostridiales Family XV. Incertae Sedis    | 626             | -                    | -                    | 244               | 812               |
| Eremotheciaceae                            | 622             | -                    | -                    | 146               | 312               |
| Brucellaceae                               | 614             | -                    | -                    | 105               | 185               |
| Podoviridae                                | 570             | -                    | -                    | 262               | 2,117             |
| Giraffidae                                 | 569             | -                    | -                    | -                 | -                 |
| Alteromonadaceae                           | 568             | -                    | -                    | 113               | 469               |
| Mustelidae                                 | 568             | -                    | -                    | -                 | -                 |
| Rubrobacteraceae                           | 548             | -                    | -                    | 118               | 556               |
| Leporidae                                  | 506             | -                    | -                    | 103               | 129               |
| Mimiviridae                                | 500             | -                    | -                    | -                 | 309               |
| Alicyclobacillaceae                        | 498             | -                    | -                    | 122               | 564               |
| Equidae                                    | 494             | -                    | -                    | -                 | -                 |
| Opitutaceae                                | 492             | -                    | -                    | 109               | 524               |
| Euphorbiaceae                              | 483             | -                    | -                    | -                 | -                 |
| Hyphomonadaceae                            | 472             | -                    | -                    | -                 | 153               |
| Alcanivoracaceae                           | 471             | -                    | -                    | 132               | 289               |
| Halobacteroidaceae                         | 465             | -                    | -                    | 408               | 648               |
| Sphaerobacteraceae                         | 458             | -                    | -                    | -                 | 330               |
| Archangiaceae                              | 458             | -                    | -                    | 149               | 372               |
| Candidatus Brocadiaceae                    | 457             | -                    | -                    | 249               | 236               |
| Segniliparaceae                            | 423             | -                    | -                    | 132               | 332               |
| Schistosomatidae                           | 416             | -                    | -                    | 296               | 524               |
| Desulfobulbaceae                           | 415             | -                    | -                    | 126               | 406               |
| Erythrobacteraceae                         | 400             | -                    | -                    | -                 | 382               |
| Piscirickettsia group                      | 399             | -                    | -                    | 102               | 248               |
| Pelobacteraceae                            | 396             | -                    | -                    | 249               | 588               |
| Solibacteraceae                            | 390             | -                    | -                    | -                 | 286               |
| Dasyuridae                                 | 372             | -                    | -                    | 400               | 358               |
| Heliobacteriaceae                          | 371             | -                    | -                    | 198               | 502               |
| Acaridae                                   | 341             | -                    | -                    | 111               | 217               |
| Rhodothermaceae                            | 334             | -                    | -                    | -                 | 722               |
| Iridoviridae                               | 333             | -                    | -                    | -                 | -                 |
| Cyclobacteriaceae                          | 328             | -                    | -                    | 184               | 264               |
| Desulfarculaceae                           | 317             | -                    | -                    | 149               | 440               |
| Trueperaceae                               | 309             | -                    | -                    | 104               | 200               |
| Dictyoglomaceae                            | 298             | -                    | -                    | 147               | 166               |
| Phycisphaeraceae                           | 296             | -                    | -                    | 135               | 370               |
| Desulfobacteraceae                         | 282             | -                    | -                    | -                 | 343               |
| Vibrionaceae                               | 277             | -                    | -                    | -                 | 400               |
| Gallionella group                          | 275             | -                    | -                    | -                 | 311               |
| Hydrogenothermaceae                        | 275             | -                    | -                    | 118               | 156               |
| Ignavibacteriaceae                         | 268             | -                    | -                    | -                 | 155               |
| Methylococcaceae                           | 256             | -                    | -                    | -                 | 296               |
| Shewanellaceae                             | 252             | -                    | -                    | 102               | 161               |
| Nostocaceae                                | 240             | -                    | -                    | -                 | 113               |
| Nitrosomonadaceae                          | 229             | -                    | -                    | 104               | 271               |
| Hydrogenophilaceae                         | 227             | -                    | -                    | -                 | 209               |
| Orbaceae                                   | 223             | -                    | -                    | 158               | 189               |
| Acidithermaceae                            | 218             | -                    | -                    | -                 | 188               |
| Caviidae                                   | 218             | -                    | -                    | -                 | -                 |
| Parvularculaceae                           | 218             | -                    | -                    | -                 | 137               |
| Planctomycetaceae                          | 217             | -                    | -                    | 111               | 206               |
| Tetrahymenidae                             | 214             | -                    | -                    | -                 | -                 |
| Natronaerobiaceae                          | 212             | -                    | -                    | 132               | 209               |
| Nitrospiraceae                             | 211             | -                    | -                    | -                 | 136               |
| African mole-rats                          | 207             | -                    | -                    | 104               | 158               |
| Deferribacteraceae                         | 207             | -                    | -                    | 279               | 268               |
| Caldilineaceae                             | 207             | -                    | -                    | 100               | 224               |
| Syntrophaceae                              | 205             | -                    | -                    | 115               | 216               |
| Brevibacteriaceae                          | 200             | -                    | -                    | -                 | -                 |
| Gemmantimonadaceae                         | 199             | -                    | -                    | -                 | 139               |
| Desulfomicrobiaceae                        | 194             | -                    | -                    | 103               | 219               |
| Thermoanaerobacterales Family IV. Incertae | 186             | -                    | -                    | 109               | 222               |

DNA from dust: the first field isolated genomes of MDV-1, from virions in poultry dust and chicken feather follicles.

| Family Name               | Farm B-<br>dust | Farm B-<br>feather 1 | Farm B-<br>feather 2 | Farm A-<br>dust 1 | Farm A-<br>dust 2 |
|---------------------------|-----------------|----------------------|----------------------|-------------------|-------------------|
| Strongylocentrotidae      | 186             | -                    | -                    | -                 | -                 |
| Fabaceae                  | 184             | -                    | -                    | -                 | 389               |
| Chitinophagaceae          | 178             | -                    | -                    | -                 | 239               |
| Thermodesulfobacteriaceae | 170             | -                    | -                    | 154               | 203               |
| Desulfurobacteriaceae     | 168             | -                    | -                    | -                 | 104               |
| Sulfuricellaceae          | 163             | -                    | -                    | -                 | -                 |
| Legionellaceae            | 160             | -                    | -                    | -                 | -                 |
| Colwelliaceae             | 159             | -                    | -                    | -                 | 144               |
| Entomoplasma group        | 159             | -                    | -                    | -                 | 152               |
| Syntrophomonadaceae       | 158             | -                    | -                    | -                 | 123               |
| Camelidae                 | 154             | -                    | -                    | -                 | 209               |
| Debaryomycetaceae         | 152             | -                    | -                    | 174               | -                 |
| Cryomorphaceae            | 151             | -                    | -                    | 113               | 273               |
| Bdellovibrionaceae        | 145             | -                    | -                    | -                 | 142               |
| Ferrimonadaceae           | 145             | -                    | -                    | -                 | 105               |
| Saprospiraceae            | 144             | -                    | -                    | -                 | 166               |
| Roseiflexaceae            | 140             | -                    | -                    | -                 | 324               |
| Chrysiogenaceae           | 139             | -                    | -                    | -                 | 196               |
| Tetraodontidae            | 139             | -                    | -                    | -                 | -                 |
| Chloroflexaceae           | 133             | -                    | -                    | -                 | -                 |
| Draconibacteriaceae       | 130             | -                    | -                    | -                 | 117               |
| Cneoraceae                | 127             | -                    | -                    | 200               | 300               |
| Culicidae                 | 124             | -                    | -                    | -                 | 131               |
| Flammeovirgaceae          | 117             | -                    | -                    | -                 | -                 |
| Hypocreaceae              | 113             | -                    | -                    | -                 | -                 |
| Leeaceae                  | 112             | -                    | -                    | 216               | 218               |
| Rivulariaceae             | 111             | -                    | -                    | -                 | -                 |
| Arthrodermataceae         | 110             | -                    | -                    | -                 | -                 |
| Hahellaceae               | 107             | -                    | -                    | -                 | 107               |
| Desulfurellaceae          | 107             | -                    | -                    | -                 | 117               |
| Pinaceae                  | 103             | -                    | -                    | -                 | -                 |
| Noelaerhabdaceae          | 103             | -                    | -                    | 512               | 379               |
| Acidithiobacillaceae      | 103             | -                    | -                    | -                 | 247               |
| Sphaeriaceae              | 103             | -                    | -                    | -                 | -                 |
| Costariaceae              | -               | -                    | -                    | 130               | -                 |
| Chaetomiaceae             | -               | -                    | -                    | 241               | 274               |
| Alligatoridae             | -               | -                    | -                    | -                 | 253               |
| Onchocercidae             | -               | -                    | -                    | -                 | 119               |
| Mamiellaceae              | -               | -                    | -                    | -                 | 161               |
| Drosophilidae             | -               | -                    | -                    | -                 | 178               |
| Loliginidae               | -               | -                    | -                    | -                 | 171               |
| Hydridae                  | -               | -                    | -                    | -                 | 181               |
| Thermodesulfobiaceae      | -               | -                    | -                    | -                 | 136               |
| Mycosphaerellaceae        | -               | -                    | -                    | 349               | 1,122             |
| Balaenopteridae           | -               | -                    | -                    | -                 | 754               |
| Francisella group         | -               | -                    | -                    | -                 | 146               |
| Lagriidae                 | -               | -                    | -                    | -                 | 109               |
| Dipodascaceae             | -               | -                    | -                    | 220               | -                 |
| Syntrophobacteraceae      | -               | -                    | -                    | -                 | 119               |
| Rhabditidae               | -               | -                    | -                    | 126               | -                 |
| Pseudoalteromonadaceae    | -               | -                    | -                    | 127               | 231               |
| Retroviridae              | -               | -                    | -                    | 296               | 174               |
| Sarcocystidae             | -               | -                    | -                    | 261               | 140               |
| Fibrobacteraceae          | -               | -                    | -                    | -                 | 140               |
| Mycosyringaceae           | -               | -                    | -                    | -                 | 228               |
| Magnetococcaceae          | -               | -                    | -                    | -                 | 102               |
|                           | 26,519,857      | 386,315              | 342,077              | 14,241,186        | 25,157,407        |
